# Supplementary material for: What is the right sequencing approach? Solo VS extended family analysis in consanguineous populations
Source: BMC Med Genomics. 2020 Jul 17;13:103. doi: 10.1186/s12920-020-00743-8 (PMC7368798; doi:10.1186/s12920-020-00743-8)
Supplement: Supplementary file 3 — Additional file 3. [file 12920_2020_743_MOESM3_ESM.xlsx]

## Sheet: Sheet1
Case	HPOs	Age At Testing	Gender	Test	Test Type	Consanguinity	Family History	Affected sibiling	Results	Gene	Variant	Protein	Zygosity	Internal variant classification	Inheritance	Omim	ACMG Classification	ClinVar submission for our study	Gene 2	Variant 2	Protein 2	Zygosity 2	pathogenicity 2	Inheritance	Omim	ACMG Classification	ClinVar
1	global developmental delay (HP:0001263), scaly skin(HP:0040189) and grad II hydronephrosis (HP:0000126) with right vesicouretric reflux (HP:0000076).	8	Male	WES	Plus	Yes	Yes	Yes	Positive	SUMF1	c.785A>G	p.Gln262Arg	Homo	LP	AR	272200	LP (PM1, PM2, PP2, PP3)	SCV000854672.1
2	Developmental delay (HP:0001263), epilepsy(HP:0001250), Vertical nystagmus (HP:0010544), Spasticity (HP:0001257) with axial hypotonia (HP:0008936), Visual impairment (HP:0000505), Basal ganglia calcification (HP:0002135)	3	Male	WES	Trio	Yes	No	No	Positive	RNASEH2B	c.356A>G	p.Asp119Gly	Homo	LP	AR	610181	LP (PM2, PP1, PP2, PP3, PP5	SCV001133171.1
3	Hypotonia (HP:0001290), Scoliosis (HP:0002650), developmental dysplasia of the hip (HP:0001385), Club foot (HP:0001762), Pectus excavatum (HP:0000767), motor delay (HP:0001270).	6	Female	WES	Trio	Yes	Yes	No	Positive	PIEZO2	c.5716C>T	p.Arg1906*	Homo	P	AR	617146	P (PVS1, PM2, PP3)	SCV001133019.1
4	Progressive microcephaly (HP:0000253), with seizures (HP:0001250) , cerebellar atrophy (HP:0001272)	5	Male	WES	Trio	No	Yes	No	Positive	QARS	c.1058G>T	p.Gly353Val	Homo	LP	AR	615760	VUS (PM2, PP3)	SCV001133019.2
5	Poor vision (HP:0000505), amblyopia (HP:0000646), and nystagmus (HP:0000639)	6	Male	WES	Trio	No	Yes	No	Positive	G6PD	c.233T>C	p.Ile78Thr	Hemi	LP	XL	300908	LP (PM2, PP1, PP4, PP2, PP3, PP5)	SCV001132842.1
6	chronic refractory immune thrombocytopenia (HP:0001973) respond to IVIG, pancytopenia (HP:0001876) and immune deficiency (HP:0002721).	14	Male	WGS	Trio	No	No	No	Positive	DCAF17	c.436del	p.Ala147Hisfs*9	Homo	P	AR	241080	P (PVS1, PM2, PP3, PP5)	SCV001132988.1
7	Autistic behavior(HP:0000729), intellectual disability(HP:0001249), sere speech (HP:0000750) and social delay(HP:0012434), moderate hearing loss ( Moderate hearing impairment)(HP:0012713)	13	Male	WES	Solo	Yes	No	No	Positive	HUWE1	c.5986C>T	p.Arg1996Cys	Hemi	LP	XL	300706	VUS (PM2)	SCV001190814.1
8	Developmental delay (HP:0001263), Divergent squent (HP:0000577) ,Lower limb spasticity (HP:0002061) with axial hypotonia (HP:0008936)	3	Female	WES	Trio	No	No	No	Positive	SEPSECS	c.1466A>T	p.Asp489Val	Homo	LP	AR	613811	VUS (PM2)	SCV000222775
9	Cystinuria (HP:0003131)& Hypertension (HP:0000822)	12	Female	WES	Solo	Yes	Yes	Yes	Positive	SLC3A1	c.1400T>A	p.Met467Lys	Homo	LP	AR	220100	LP (PM2, PP1, PP2, PP3, PP5)	VCV000018115.8
10	developmental delay (HP:0001263), early closure of sutures (HP:0005458) and hypomyelination of brain (HP:0006808), hypotonia (HP:0001290)	5	Male	WES	Trio	No	No	No	Positive	COG6	c.1167-24A>G	NA	Homo	LP	AR	615328	LP (PM2, PP5, PP2 PM6, PP1)	SCV001132963.1
11	global developmental delay (HP:0001263), Vermis hypoplasia (HP:0001320), retinopathy (HP:0000488)	3	Male	WES	Trio	Yes	Yes	No	Positive	TUBA1A	c.5G>A	p.Arg2His	Het	LP	AD	611603	LP (PM2, PP5, PM6, PP1)	SCV001133166.1
12	short stature (HP:0004322), Acetabular dysplasia (HP:0008807)	21	Male	WES	Solo	No	Yes	Yes	Positive	COL2A1	c.1510G>A	p.Gly504Ser	Het	LP	AD	616583 271700	LP (PM1, PM2, PM5, PP2, PP3, PP5)	SCV001133160.1
13	Oligodactyly(HP:0012165), Ectrodactyly(HP:0100257)	2	Male	WES	Trio	Yes	No	No	Positive	WNT10B	c.338-1G>C	NA	Homo	P	AR	225300	P (PVS1, PM2, PP3)	SCV000778302.1
14	Blepharoptosis(HP:0000508), small palpebral fissure(HP:0045025), Microphthalmia(HP:0000568),	3	Female	WES	Trio	Yes	No	No	Positive	FOXL2	c.313_315del	p.Asn105del	Het	LP	AD	110100	LP (PM1, PM2, PM4)	SCV001133048.1
15	developmental delay (HP:0001263), congenital heart defect (HP:0001627), dysmorphic facial features (HP:0001999), low anterior hairline (HP:0000294), long eyebrows (HP:0004523), flat philtrum (HP:0000319), decreased bone density (HP:0004349), pulmonic valve stenosis (HP:0001642), Ebstein's anomaly of the tricuspid valve (HP:0010316), white matter abnormalities (HP:0002500), Abnormality of the peri…	5	Female	WES	Trio	Yes	Yes	Yes	Positive	XYLT2	c.520del	p.Ala174Profs*35	Homo	P	AR	605822	P (PVS1, PM2, PP3)	SCV001133161.1
16	epilepsy (HP:0001250),	12	Male	WES	Trio	Yes	Yes	Yes	Positive	SCN1A	c.1244T>C	p.Ile415Thr	Het	LP	AD	604403	LP (PM1, PM2, PP2, PP3, BS2)	SCV001133161.2
17	eosinophilia (HP:0001880), Thrombocytopenia (HP:0001873), Unilateral renal hypoplasia (HP:0012583),	9	Male	WES	Trio	No	Yes	Yes	Positive	RUNX1	c.610C>T	p.Arg204*	Het	P	AD	601399	P (PVS1, PM1, PM2, PP3, PP5)	SCV001133125.1
18	Microcephaly(HP:0000252), Developmental delay (HP:0001263), Epilepsy(HP:0001250), Global brain atrophy(HP:0002283), Gastroesophageal reflux(HP:0002020),	3	Male	WES	Trio	Yes	No	No	Positive	UNC80	c.8770G>A	p.Val2924Met	Homo	LP	AR	616801	VUS	RCV000920128
19	GLANZMANN THROMBASTHENIA (OMIM:273800).	2	Female	WES	Trio	No	Yes	No	Positive	ITGB3	c.727G>C	p.Asp243His	Homo	LP	AR	273800	LP (PM1, PM2, PM5, PP2, PP3)	SCV001133153.1
20	CHARCOT-MARIE-TOOTH DISEASE, DEMYELINATING, TYPE 4F (OMIM: 614895)	6	Female	WES	Solo	Yes	No	No	Positive	PRX	c.3085A>T	p.Arg1029*	Homo	P	AR	614895	P (PVS1, PM2, PP3)	RCV000985146
21	Global developmental delay(HP:0001263), Spasticity(HP:0001257), Dysmorphic facial features(HP:0001999), High-arched palate(HP:0000218), Thinning of the corpus callosum(HP:0002079), Axial hypotonia(HP:0008936), Cerebral white matter abnormalities(HP:0002500).	6	Female	WES	Trio	Yes	Yes	No	Positive	MCOLN1	c.1336G>A	p.Val446Met	Homo	LP	AR	252650	LP (PM1, PP2, PP3, PP5, PP1)	SCV001133212.1
22	Corpus callosum agenesis(HP:0001274), Periventricular cysts(HP:0007109), Short stature(HP:00043220), Facial dysmorphism(HP:0001999), Sparse hair(HP:0008070), Posteriorly rotated(HP:0000358), Low set ears(HP:0000369), Smooth philtrum(HP:0000319), Short neck(HP:0000470), Hypertonia(HP:00012760	2	Female	WES	Solo	Yes	Yes	Yes	Positive	IHH	c.53_78delinsGGGCC	p.Leu18_Trp26delinsArgAla	Het	LP	AD	112500	VUS (PM2, PM4)	RCV000985227
23	myopia (HP:0000545), congenital hypothyroidism (HP:0000851), scoliosis(HP:0002650), chronic constipation (HP:0012450), Developmental delay (HP:0001263), laryngomalacia(HP:0001601), Hypotonia(HP:0001290), Hypertrichosis(HP:0000998), ventricular septal defect (HP:0001629).	6	Female	WES	Plus	Yes	No	No	Positive	ARID1B	c.4975del	p.Val1659Serfs*2	Het	P	AD	135900	P (PVS1, PM2, PP3)	SCV001133067.1
24	Seizures(HP:0001250).	16	Female	WES	Plus	NA	Yes	Yes	Positive	GABRB2	c.877C>T	p.Arg293Trp	Het	LP	AD	617829	VUS (PM2, PP3)	SCV000639684.1
25	congenital nystagmus (HP:0006934), ataxia (HP:0001251), areflexia (HP:0001284)	15	Female	WES	Solo	Yes	Yes	Yes	Positive	MAG	c.795C>A	p.Ser265Arg	Homo	LP	AR	616680	VUS PM2, PP3)	SCV000639684.2
26	Overlapping fingers(HP:0010557), Unilateral ptosis(HP:0007687), Developmental delay (HP:0001263)	3	Male	WES	Plus	Yes	Yes	Yes	Positive	ECEL1	c.1210C>T	p.Arg404Cys	Homo	LP	AR	615065	VUS (PM2, PP3, PP5)	SCV001133101.1
27	Coloboma of optic nerve(HP:0000588),	4	Male	WES	Trio	Yes	Yes	No	Positive	CNGB3	c.2410A>T	p.Lys804*	Homo	LP	AR	262300 248200	VUS (PVS1, PP3)	SCV000748260.3
28	Congenital genaralized lipodystrophy type 1, (OMIM: 608594), (AGPAT2 GEN), Fatty liver (HP:0001397), hepatomegaly (HP:0002240), mitral valve regurgitation (HP:0001653), tricuspid valve regurgitation (HP:0005180).	2	Female	WES	Solo	Yes	Yes	Yes	Positive	AGPAT2	c.335del	p.Pro112Argfs*39	Homo	P	AR	608594	P (PVS1, PM2, PP3)	SCV001133050.1
29	Developmental delay (HP:0001263), Hypotonia(HP:0001290),ataxic gait (HP:0002066),	8	Female	WES	Trio	Yes	Yes	No	Positive	NR2F1	c.1117C>T	p.Arg373*	Het	P	AD	615722	P (PVS1, PM2, PP3)	SCV001133229.1
30	recurrent aspiration penumonia (HP:0002100), hepatosplenomegaly (HP:0001433), hypotonia (HP:0001290), Niemann-Pick disease type A (257200)	4	Female	WES	Solo	Yes	No	No	Positive	SMPD1	c.1430C>T	p.Pro477Leu	Homo	LP	AR	257200	LP (PP4, PP1, PM1, PS4, PP3)	SCV001133187.1
31	dysmorphic features (HP:0001999), large forehead (HP:0002003), depressed nasal bridge (HP:0005280), bulbous nose (HP:0000414), pulmonary artery stenosis (HP:0004415), gastroesophageal reflux disease (HP:0002020), speech delay (HP:0000750), attention deficit hyperactivity disorder (HP:0007018), Noonana syndrome (Omim:163950)	7	Female	WES	Plus	No	Yes	Yes	Positive	PTPN11	c.1519G>A	p.Gly507Arg	Het	LP	AD	163950	LP (PM1, PM2, PM5, PP2, PP3, PP5)	SCV001133024.1
32	Hypertrophic cardiomyopathy (HP:0001639), retrognathia (HP:0000278), synopherys, webbed neck (HP:0000465), thoracic hypoplasia (HP:0005257), pectus carinatum (HP:0000768), Heat intolerance (HP:0002046), excersice intolerance (HP:0003546)	13	Male	WES	Trio	No	No	No	Positive	FLNC	c.3557C>T	p.Ala1186Val	Het	LP	AD	617047 614065 609524	LP (PM6, PM2, PP5, PP2, PP3)	RCV000987973
33	CAMPTODACTYLY-ARTHROPATHY-COXA VARA-PERICARDITIS SYNDROME (OMIM:208250), Camptodactyly (HP:0012385), Arthropathy (HP:0003040),	14	Male	WES	Solo	No	No	No	Positive	PRG4	c.3139_3140del	p.Lys1047Aspfs*33	Homo	LP	AR	208250	LP (PVS1, PM2)	SCV001133084.1
34	Congenital hypothyroidism (HP:0000851), hypermetropia (HP:0000540), decreased fetal movement (HP:0001558), wide distal phalenx (HP:0009642) ,dry skin (HP:0000958), Nystagmus (HP:0006934),	11	Male	WES	Plus	Yes	Yes	Yes	Positive	CNGA3	c.830G>A	p.Arg277His	Homo	LP	AR	216900	LP (PM1, PM2, PP5, PP3)	SCV001133237.1
35	Hydrocephalus (HP:0000238), aqueduct stenosis (HP:0002410), seizures (HP:0001250), abnormal gait (HP:0001288), toe walking (HP:0040083), frequent falls (HP:0002359), hyperactivity (HP:0000752), epicantal fold (HP:0000286), hypertelorism (HP:0000316), upslanted palpebral fissure (HP:0000582), bulbus nose (HP:0000414)	6	Male	WES	Plus	Yes	No	No	Positive	MPDZ	c.628C>T	p.Gln210*	Homo	P	AR	615219	P (PVS1, PM2, PP3)	RCV000043475
36	developmental delay (HP:0001263), speech delay (HP:0000750), anhidrosis (HP:0000970), sweat gland hypoplasia (HP:0011135), dolichocephaly (HP:0000268), sparse hair (HP:0008070), high forehead (HP:0000348), hypertelorism (HP:0000316), small nose (HP:0003196), short philtrum (HP:0000322), small teeth (HP:0000691)	6	Male	WES	Trio	Yes	Yes	No	Positive	NTRK1	c.526C>T	p.Gln176*	Homo	P	AR	256800	P (PVS1, PM2, PP3, PP5)	SCV001133064.1
37	global developmental delay (HP:0001263), cataract (HP:0000518), spasiticity (HP:0001257)	4	Female	WGS	Solo	Yes	No	No	Positive	RAB3GAP1	c.1009C>T	p.Arg337*	Homo	P	AR	600118	P (PVS1, PM2, PP3, PP5)	SCV001133042.1
38	Urinary tract infection (HP:0000010), hypomagnesemia (HP:0002917), medullary nephrocalcinosis (HP:0012408), renal stone (HP:0000787)	14	Female	WGS	Plus	Yes	Yes	Yes	Positive	CLDN16	c.445C>T	p.Arg149*	Homo	P	AR	248250	P (PVS1, PM2, PP3)	SCV000854724.1
39	short stature (HP:0004322), skeletal dysplasia (HP:0002652), METAPHYSEAL CHONDRODYSPLASIA, SCHMID TYPE (omim:156500)	11	Male	WES	Solo	No	Yes	Yes	Positive	COL10A1	c.1771T>G	p.Cys591Gly	Het	LP	AD	156500	LP (PM1, PM2, PM5, PP3)	SCV001133027.1
40	central hypoventilation syndrome (OMIM:209880) and obesity (HP:0001513)	15	Female	WGS	Solo	No	No	No	Positive	PHOX2B	c.721_722ins25	p.Ala241Glyfs*127	het	P	AD	209880	P (PVS1,PS2, PM1)	SCV001133027.2
41	Attention deficit hyperactivity disorder (HP:0007018), Developmental delay (HP:0001263) , Autism spectrum disorder (HP:0000729), behavioral abnormality (HP:0000708), aggressiveness (HP:0000718).	11	Male	WES	Plus	No	Yes	Yes	Positive	SYP	c.512C>G	p.Thr171Arg	Hem	LP	XL	300802	VUS (PM2, PP3)	SCV001133027.3
42	Microcephaly (HP:0000252), Cholestasis (HP:0001396), hyperbilirubinemia (HP:0002904), splenomegaly (HP:0001744),	14	Female	WES	Trio	Yes	No	No	Positive	ABCC2	c.2273G>T	p.Gly758Val	Homo	LP	AR	237500	LP (PM1, PM2, PP1, PP3)	SCV000778304.2
43	Developmental delay (HP:0001263), Spasticity (HP:0001257), Microcephaly (HP:0000252)	4	Male	WES	Trio	Yes	No	No	Positive	RNASEH2A	c.557G>A	p.Arg186Gln	Homo	LP	AR	610333	LP (PM1, PM2, PP1, PP3, PP4, PP5)	SCV001133033.1
44	Polycystic kidney disease (HP:0000113), Bilateral grade 1 hydronephrosis (HP:0000126)., Hypospadias (HP:0000047), Post-axial Polydactaly (all limbs) (HP:0100259), (ASD)(HP:0001631), Developmental delay (HP:0001263)	4	Male	WES	Trio	Yes	No	No	Positive	MKKS	c.116C>T	p.Pro39Leu	Homo	LP	AR	605231	LP (PM1, PM2, PP1, PP3, PP4)	RCV000985035
45	acquired microcephaly (HP:0005484), global developmental delay (HP:0001263), speech delay (HP:0000750), Rett syndrome (OMIM:312750)	7	Female	WES	Plus	No	No	No	Positive	MECP2	c.916C>T	p.Arg306*	Het	p	XL	312750	P (PVS1, PM1, PM2, PP3, PP5)	SCV001133059.1
46	jaundice (HP:0000952), anemia (HP:0001903), high reticulocytes (HP:0001923), thrombocytopenia (HP:0001873)	5	Female	WES	Plus	Yes	Yes	Yes	Positive	SPTA1	c.5263C>G	p.His1755Asp	Homo	LP	AR	266140 270970	VUS (PM2, PP3)	SCV001133069.1
47	Encephalopathy HP:0001298, global developmental delay (HP:0001263), focal seizures (HP:0007359), myoclonic seizures HP:0011166, atonic seizures HP:0011170, poor repetitive and expressive language development HP:0000750, hypotonia HP:0001290, arachnoid cyst HP:0100702	6	Male	WES	Solo	Yes	Yes	Yes	Positive	SLC13A5	c.655G>A	p.Gly219Arg	Homo	P	AR	615905	P (PS4, PM1, PM2, PP3, PP5)	SCV001133192.1
48	congenital nephrotic syndrome (HP:0008677), Cardiomyopathy (HP:0001638), long Q-T SYNDROME (HP:0001657), Encephalopathy (HP:0001298), seizure (HP:0001250), anemia (HP:0001903), hypokalemia (HP:0002900)	4	Female	WES	Trio	Yes	No	No	Positive	ADCK4	c.532C>T	p.Arg178Trp	Homo	LP	AR	615573	LP (PM2, PP3, PP5, PP4, PP1)	SCV001133137.1
49	intellectual disability (HP:0001249), gait abnormalities (HP:0001288), bilateral hearing loss (HP:0008513), attention deficit hyperactivity disorder (HP:0007018).	9	Female	WES	Trio	Yes	Yes	No	Positive	PTRH2	c.257A>C	p.(Gln86Pro)	HOMO	LP	AR	616263	LP (PM1, PM2, PP1, PP3, PP4, PP5)	SCV001133181.1
50	corrected choanal atresia (HP:0000453), closed Ventricular septal defect (HP:0001629), myopia (HP:0000545), absent corpus callosum (HP:0001274), growth deficiency (HP:0001510) and global developemtal delay (HP:0001263).	10	Female	WES	Trio	Yes	No	No	Positive	SMG9	c.701+4A>G	NA	HOMO	LP	AR	616920	LP (PM2, PP1, PP3, PP4, PP5)	SCV000854654.1
51	Necrotizing encephalopathy (HP:0006976), seizure (HP:0001250), Gastroesophageal reflux (HP:0002020), Scoliosis (HP:0002650), Developmental Dysplasia Of The Hip (OMIM:615612), asthmatic (HP:0012653)	10	Male	WGS	Plus	Yes	Yes	Yes	Positive	DLL4	c.1392C>A	(p.C464*)	Het	P	AD	616589	P (PVS1, PM2, PP3)	SCV001133138.1
52	global developmental delay (HP:0001263),	8	Female	WES	Trio	Yes	No	No	Positive	INPP5E	c.1304G>A	(p.Arg435Gln)	Homo	LP	AR	213300	LP (PM2, PP1, PP3, PP4, PP5)	SCV001133049.1
53	Developmental delay(HP:0001263), Cleft palate(HP:0000175), Speech delay(HP:0000750), Myoclonus(HP:0001336), Ichthyosis(HP:0008064), Mental-retardation(HP:0001249).	8	Female	WGS	Plus	Yes	No	No	Positive	PGAP3	c.850C>T	p.(His284Tyr)	HOMO	LP	AR	615716	LP (PM1, PM2, PP1, PP3, PP4)	SCV001133129.1
54	global developmental delay (HP:0001263), Downslanted palpebral fissures (HP:0000494), Epicanthus (HP:0000286), abnormal dentition (HP:0000164), spasticity (HP:0001257) hyperreflexia (HP:0001347)	11	Male	WES	Plus	Yes	Yes	Yes	Positive	SNX14	c.2722C>T	p.Gln908Ter	Homo	P	AR	616354	P (PVS1, PM2, PP3)	SCV001133129.2
55	Abnormality of the cerebral white matter (HP:0002500), hypomyelination (HP:0003429)	7	Female	WES	Plus	Yes	Yes	No	Positive	CYP2U1	c.947 A>T	p.(Asp316Val)	Homo	LP	AR	615030	VUS (PM2, PP3, PP5)	SCV000854655.1
56	Developmental delay(HP:0001263), Cerebellar atrophy(HP:0001272)	7	Male	WES	Trio	Yes	Yes	Yes	Positive	CWF19L1	c.605dup	p.(Tyr202*)	HOMO	P	AR	616127	P (PVS1, PM2, PP3)	SCV001133016.1
57	cleft palate (HP:0000175), aspiration pneumonia (HP:0011951) chest infections (HP:0002783), ear infection (HP:0000388), Laryngomalacia (OMIM:150280)	6	Male	WES	Trio	Yes	No	No	Positive	LARP7	c.1045_1051dupAAGGATA	p.(Thr351Lysfs*9)	Homo	LP	AR	615071	LP (PVS1, PM2, BP4)	SCV001133016.2
58	global developmental delay (HP:0001263),	7	Male	WES	Trio	No	No	No	Positive	CTNNB1	c.1981C>T	(p.Arg661*)	Het	P	AD	615075	P (PVS1, PM2, PP3, PP5)	SCV001133140.1
59	3-Methylglutaconic aciduria (HP:0003535) deafness (HP:0000365), encephalopathy (HP:0001298), global developmental delay (HP:0001263), Failure to thrive (HP:0001508), Dystonia (HP:0001332), Bialteral femoral fracture (HP:0031846)	7	Female	WES	Trio	Yes	No	No	Positive	SERAC1	c.438del	p.Thr147Argfs*22	Homo	LP	AR	614739	LP (PVS1, PM2, BP4)	SCV001132994.1
60	Asthma(HP:0002099), Gastroesophageal reflux(HP:0002020), Global developmental delay(HP:0001263), Microcephaly(HP:0000252), Seizure(HP:0001250),	5	Female	WES	Solo	Yes	Yes	No	Positive	UGDH	c.950G>A	p.(Arg317Gln)	HOMO	LP	AR	NA	LP (PM2, PP1, PP3, PP4, PP5)	RCV001004657
61	dysmorphic features(HP:0001999), microcephaly (HP:0000252), arched eyebrows (HP:0002553), short philtrum (HP:0000322) . growth delay (HP:0001510), global developmental delay (HP:0001263) , hypoplastic corpus callosum (HP:0002079).	5	Male	WGS	Solo	Yes	Yes	Yes	Positive	NUDT2	c.34C>T	p.(Arg12*)	HOMO	LP	AR	NA	LP (PM2, PM5, PP1, PP3)	RCV001004658
62	Sever Global Developmental Delay(HP:0011344), Microcephaly(HP:0000252), Clubfoot(HP:0001762), Seizures(HP:0001250), Swallowing difficulties(HP:0002015), Gastroesophageal reflux(HP:0002020), Thoracic scoliosis(HP:0002943), Short neck(HP:0000470), congenital dermal melanocytosis(HP:0100814).	5	Female	WES	Trio	Yes	Yes	No	Positive	TUBB2A	c.1178C>T	p.Ala393Val	HET	LP	AD	615763	LP (PP1, PP2, PP3, PP4, PM6, PM2)	SCV001133111.1
63	prenatally rhizomelia (HP:0008905), eyelid coloboma (HP:0000625), short stature (HP:0004322), chorioretinal coloboma (HP:0000567), Scleroconea (HP:0000647), microcornea (HP:0000482), Iris coloboma (HP:0000612)	2	Female	WGS	Solo	No	No	No	Positive	MAB21L2	c.151C>G	p.(Arg51Gly)	HET	LP	AD	615877	LP (PM1, PM2, PM5, PP3)	SCV001133057.1
64	global developmental delay (HP:0001263), Abnormal blood ion concentration (HP:0003111), Osteopenia (HP:0000938), sever hypotonia (HP:0001290), cerebral palsy (HP:0100021),	7	Female	WES	Trio	Yes	Yes	No	Positive	PCCA	c.425G>A	p.Gly142Asp	Homo	LP	AR	606054	LP (PM1, PM2, PP3, PP5)	RCV000186085
65	global developmental delay (HP:0001263), Generalized hypotonia (HP:0001290), Developmental Dysplasia Of The Hip (OMIM:615612), Ventriculomegaly (HP:0002119), Abnormal fundus morphology (HP:0001098), high methionine level (HP:0003235)	5	Female	WES	Trio	No	No	No	Positive	ADK	c.813dup	p.Asn272Glufs*16	Homo	P	AR	614300	P (PM2, PP1, PP4, PVS1)	RCV000985064
66	Autistic behavior (HP:0000729), hyperactivity (HP:0000752)	11	Male	WES	Trio	Yes	Yes	Yes	Positive	FAT1	c.3995G>A	(p.Arg1332His	Homo	LP	AR	NA	VUS	RCV000985065
67	global developmental delay (HP:0001263), Generalized hypotonia (HP:0001290),	7	Female	WES	Trio	Yes	No	No	Positive	GLI2	c.1418G>A	p.Arg473His	Homo	LP	AD	615849 610829	VUS (PP3)	RCV000985066
68	global developmental delay (HP:0001263), SNHL (HP:0000365), AVSD (HP:0006695), large ASD (HP:0001631), Hypoplastic RV (HP:0010954), Pulmonary stenosis (HP:0001642), Anal atresia (HP:0002023), cloacal anaomaly (HP:0012620)	4	Female	WES	Trio	Yes	No	No	Positive	UBR1	c.1440-1G>A	NA	Homo	P	AR	243800	P (PVS1, PM2, PP3)	SCV001133141.1
69	Generalized hypotonia (HP:0001290), Joint laxity HP:0001388, Chiari I malformation HP:0007099, partial corpus callosum agenesis HP:0001338	5	Male	WES	Trio	Yes	No	No	Positive	CHRND	c.1367A>G	p.Asn456Ser	Homo	LP	AR	616322	VUS	RCV000542114
70	infantile spasm (HP:0012469), global developmental delay (HP:0001263), Generalized hypotonia (HP:0001290),	6	Male	WES	Trio	Yes	Yes	Yes	Positive	SLC25A22	c.754C>T	p.Arg252Trp	Homo	LP	AR	609304	VUS (PM2, PP3)	SCV001133219.1
71	case of Ullrich Congenital Muscular Dystrophy, Developmental Dysplasia Of The Hip (OMIM:615612),	11	Female	WES	Plus	Yes	Yes	Yes	Positive	COL6A3	c.9128G>A	p.Arg3043His	Homo	LP	AR	158810 616411 254090	VUS (PP5, BP4)	VCV000192261.7
72	Bronchial asthma (HP:0002099), global developmental delay (HP:0001263),	6	Female	WES	Trio	Yes	No	No	Positive	NDUFS1	c.2163G>A	p.Met721Ile	Homo	LP	AR	252010	VUS (PM2, PP3)	SCV001133093.1
73	Abnormality of the cerebral white matter HP:0002500	8	Female	WES	Plus	Yes	Yes	No	Positive	EIF2B2	c.591C>G	p.Phe197Leu	Homo	LP	AR	603896	VUS (PM2, PP2, PP3)	SCV001133211.1
74	speech developmental delay HP:0000750, Abnormality of the basal ganglia HP:0002134, gastroenteritis HP:0031123, severe dehydration HP:0001944, Seizures HP:0001250.	11	Male	WES	Plus	Yes	No	No	Positive	KDM5C	c.3072G>T	p.Glu1024Asp	Hemi	LP	XL	300534	VUS (PM2)	SCV001133211.2
75	Becker Muscular Dystrophy ORPHA:98895, Muscle weakness HP:0001324,	12	Male	WES	Plus	No	Yes	Yes	Positive	DMD	c.8027+7A>T	NA	Hemi	LP	XL	300376	VUS (BP6)	RCV000538416
76	global developmental delay (HP:0001263),	7	Male	WES	Solo	No	Yes	Yes	Positive	ASXL3	c.2471C>T	p.Pro824Leu	Homo	LP	AD	615485	VUS (BP1)	SCV001133110.1
77	proximal muscle weakness (HP:0003701), waddling gait (HP:0002515)	15	Male	WES	Solo	Yes	No	No	Positive	FKRP	c.1012G>T	p.Val338Leu	Homo	LP	AR	607155	LP (PP1, PM1, PM2, PP2, PP3)	RCV000669472
78	Cataract (HP:0000518), global developmental delay (HP:0001263),	7	Male	WES	Solo	No	Yes	No	Positive	RAB3GAP1	c.559C>T	p.Arg187*	Homo	P	AR	600118	P (PVS1, PM2, PP3)	SCV001133041.1
79	global developmental delay (HP:0001263), Generalized hypotonia (HP:0001290), myoclonic seizure (HP:0002123)	8	Male	WES	Solo	NA	NA	NA	Positive	GAD1	c.1402T>G	p.Trp468Gly	Homo	LP	AR	603513	VUS (PM2, PP3)	SCV001133074.1
80	encephalopathy (HP:0001298)	9	Female	WES	Solo	Yes	Yes	Yes	Positive	CEP152	c.2148-17G>A	NA	Homo	LP	AR	614852 613823	VUS (BP4)	SCV001133162.1
81	progressive muscle weakness (HP:0003323), Unsteady gait (HP:0002317), myalgias (HP:0003326), Respiratory distress (HP:0002098)	21	Male	WES	Solo	NA	Yes	Yes	Positive	TTN	c.106375-2A>G	NA	Homo	P	AR	608807 611705	P (PVS1, PM2, PP3, PP5)	RCV000985108
82	hydrops fetalis HP:0001789, Fair hair HP:0002286,Coarse facial features HP:0000280, narrow chest HP:0000774, mild splenomegaly HP:0001744, short limbs HP:0009826, clubbing of toes HP:0100760, High oligosaccharides in urine HP:0012061, thrombocytopenia HP:0001873,cerebral atrophy HP:0002059	6	Male	WES	Solo	NA	NA	NA	Positive	CTSA	c.655-2A>G	NA	Homo	P	AR	256540	P (PVS1, PM2, PP3)	RCV000985155
83	Seizures HP:0001250, Generalized hypotonia HP:0001290, Brain atrophy HP:0012444	6	Female	WES	Solo	NA	Yes	Yes	Positive	TJP1	c.353G>T	p.Arg118Leu	HOMO	LP	AR	NA	VUS	RCV000985156
84	Galactocemia (OMIM:230400), Seizure (HP:0001250), Cerebral palsy (HP:0100021), global developmental delay (HP:0001263), Scoliosis (HP:0002650), GERD (HP:0002020), Sever failur to thrive (HP:0001525), Dental maloclussion (HP:0000164),	13	Female	WES	Solo	Yes	No	No	Positive	GALT	c.404C>T	p.Ser135Leu	Homo	LP	AR	230400	LP (PM1, PM5, PP2, PP3, PP5)	RCV000003802
85	global developmental delay (HP:0001263), Seizure (HP:0001250), Microcephaly (HP:0000252), Obesity (HP:0001513), Osteopenia (HP:0000938)	10	Male	WES	Plus	Yes	Yes	Yes	Positive	ASNS	c.1130A>G	p.Tyr377Cys	Homo	LP	AR	615574	VUS (PM1, PM2, PP2)	RCV000003803
86	Atrial septal defect HP:0001631, Polydactyly HP:0010442, bifid uvula HP:0000193, lobulated tongue HP:0000180, small head HP:0000252, wide fontanells HP:0000239, low anterior hair line HP:0000239, hairy forehead HP:0011335, short neck HP:0000470, depressed nasal bridge HP:0000470, low set malformed ears HP:0000377, Mandibular prognathia HP:0000303, Small for gestational age HP:0001518	5	Female	WES	Plus	Yes	Yes	Yes	Positive	DDX59	c.1654_1656del	p.Asn552del	Homo	LP	AR	174300	VUS (PM2, PP4)	RCV000985116
87	Intellectual disability (HP:0001249), Autism spectrum disorder (HP:0000729), Seizures (HP:0001250), Spasticity (HP:0001257)	11	Female	WES	Solo	No	Yes	Yes	Positive	C12orf57	c.1A>G	p.Met1?	Homo	p	AR	218340	P (PVS1, PM2, PP1, PP4, PP5)	VCV000041942.3
88	Aortic Root Diltation (HP:0002616), Inguinal hernia (HP:0000023)	9	Male	WES	Plus	Yes	Yes	Yes	Positive	SLC2A10	c.243C>G	p.Ser81Arg	Homo	LP	AR	208050	LP (PM2, PP1, PP3, PP4, PP5)	SCV001133152.1
89	hypotonia (HP:0001290), global developmental delay (HP:0001263), maternal diabetes (HP:0009800), congenital heart defect (HP:0001627), poor swallowing (HP:0002015), mild central hypotonia (HP:0011398)	2	Male	WES	Solo	Yes	No	No	Positive	PUF60	c.931del	p.(Thr311Hisfs*48)	het	p	AD	615583	P (PVS1, PM1, PM2, PP3)	SCV001133055.1
90	metabolic acidosis (HP:0001942), lactic acidosis (HP:0003128), elevated Ammonia (HP:0001987)	2	Male	WES	Solo	Yes	Yes	Yes	Positive	FBXL4	c.1555C>T	p.(Gln519*)	Homo	p	AR	615471	P (PVS1, PM2, PP3, PP5)	VCV000066090.3
91	Intellectual disability (HP:0001249), abnormal gait (HP:0001288), moderate mental retardation (HP:0002342), seizure (HP:0001250), strabismus (HP:0000486), slurred speech (HP:0001350), hyperactivity (HP:0000752), poor eye contact (HP:0000817)	11	Female	WES	Trio	No	No	No	Positive	KCNQ2	c.724T>G	p.Cys242Gly	Het	LP	AD	613720	LP (PM1, PM2, PM6, PP1, PP2, PP3, PP4, PP5)	SCV000778306.1
92	undetermined liver disease (HP:0001392)	22	Female	WES	Plus	Yes	Yes	Yes	Positive	ABCB4	c.2906G>A	p.Arg969His	Hom	LP	AR	602347	LP (PM1, PM2, PP1, PP4, BP4)	SCV000778301.1
93	Hearing impairment (HP:0000365)	10	Female	WES	Solo	Yes	Yes	Yes	Positive	OTOF	c.5375G>A	p.Arg1792His	Homo	LP	AR	601071	LP (PM1, PM2, PP1, PP3, PP5)	RCV000656336
94	Intellectual disability(HP:0001249), Speech delay(HP:0000750)	19	Female	WES	Trio	No	Yes	Yes	Positive	ALG11	c.1265C>T	p.Pro422Leu	Hom	LP	AR	613661	VUS (PM2, PP3)	RCV000656337
95	Ketotic hypoglycemia (HP:0012734), Lactic acidosis (HP:0003128).	8	Male	WES	Solo	Yes	No	No	Positive	DLD	c.685G>T	p.Gly229Cys	Hom	LP	AR	246900	LP (PM2, PP1, PP3, PP4, PP5)	RCV000012744
96	developmental delay (HP:0001263), Unibrow(HP:0000664), Microcephaly(HP:0000252), Drooling(HP:0002307), Hypotonia(HP:0001290).	7	Male	WES	Trio	Yes	Yes	Yes	Positive	SLC17A5	c.406A>G	p.Lys136Glu	Hom	LP	AR	604369	LP (PS3, PM2, PP3, PP5)	SCV001133208.1
97	Hypothyroidism(HP:0000821), Elevated liver enzymes(HP:0002910), Diabetes mellitus (HP:0000819)	21	Female	WES	Solo	Yes	Yes	No	Positive	ITPR3	c.2226C>A	p.Asp742Glu	Hom	LP	AR	222100	VUS (PP3, BP6)	VCV000774180.2
98	unsteady gait (HP:0002317), recurrent fall, Spastic paralysis affecting all four limbs (HP:0002317), brisk reflexes (HP:0001348)	6	Female	WES	Solo	Yes	No	No	Positive	SPAST	c.1496G>A	p.Arg499His	Het	LP	AD	182601	LP (PM1, PM2, PM5, PP3, PP5)	RCV000230990
99	Spastic paraplegia(HP:0001258), Ataxia(HP:0001251), Intellectual disability(HP:0001249), Developmental delay(HP:0001263), Speech delay(HP:0000750)	16	Female	WES	Trio	Yes	No	No	Positive	KIAA0196	c.2228A>G	p.Glu743Gly	Hom	LP	AR	220210	VUS (PM2)	RCV000230991
100	hypotonia(HP:0001290), Chondrodysplasia, Ptosis (HP:0001488), Spondylocostal dysostosis with Rib abnormalities (HP:0000772), Abnormal spine(HP:0000925), Bronchial asthma (HP:0002099), vitamin D deficiency (HP:0100512), inguinal hernia (HP:0000023).	6	Female	WES	Trio	Yes	No	No	Positive	PEX5	c.1822C>T	p.Arg608Trp	Het	LP	AD	214110 202370 616716	VUS (PM2)	VCV000843623.1
101	Hypotonia(HP:0001290), Developmental delay(HP:0001263), Microphthalmia(HP:0000568), Microcephaly (HP:0000252),	5	Male	WES	Trio	Yes	Yes	Yes	Positive	LARP7	c.1146_1163del	p.Leu383_Lys388del	Hom	LP	AR	615071	VUS (PM2, PM4)	VCV000843623.2
102	seizure(HP:0001250), global developmental delay (HP:0001263), Encephalopathy (HP:0001298).	8	Female	WES	Solo	Yes	Yes	Yes	Positive	GRIN2B	c.2429G>A	p.Ser810Asn	Het	LP	AD	616139	LP (PM1, PM2, PP1, PP2, PP3, PP4)	SCV001133045.1
103	Spastic quadriplegia(HP:0002510), Seizures(HP:0001250), Microcephaly(HP:0000252), Severe global developmental delay(HP:0011344), Gastroesophageal reflux(HP:0002020),	5	Female	WES	Trio	Yes	No	No	Positive	SUOX	c.520del	p.Asp174Thrfs*13	Hom	P	AR	272300	P (PVS1, PM2, PP3)	RCV000758699
104	Dysmorphic facial features, (HP:0001999), hypotonia(HP:0001290) and undescended testis (HP:0000028)	4	Male	WES	Trio	Yes	No	No	Positive	LAMA2	c.1893_1897del	p.Asp631Glufs*8	Hom	LP	AR	607855	LP (PVS1, PM2)	SCV001133034.1
105	Seizures (HP:0001250), Generalized hypertrichosis (HP:0004554)	7	Female	WES	Solo	No	No	No	Positive	ARID1B	c.3077del	p.Leu1026Argfs*104	Het	P	AD	135900	P (PVS1, PM2, PP3)	SCV001133066.1
106	poor vision (HP:0000505) and dysmorphic features (HP:0001999)	5	Male	WES	Plus	Yes	Yes	Yes	Positive	RPGRIP1	c.1107del	p.Glu370Asnfs*5	Hom	P	AR	613826	P (PVS1, PM2, PP3)	SCV001133096.1
107	Fused rib (HP:0000902), vertebrae anomalies (HP:0003468), Diaphragmatic Hernia (HP:0000776), multiple fracture (HP:0002757), patent ductus arteriosus (HP:0001643), prominent forehead (HP:0011220), long philtrum (HP:0000343), low set ears (HP:0000369), blue sclerae (HP:0000592)	4	Female	WES	Trio	Yes	No	No	Positive	ZNF469	c.5248C>A	p.Pro1750Thr	Hom	LP	AR	229200	VUS (BP4)	SCV001133096.2
108	developmental delay (HP:0001263), speech delay (HP:0000750) , hypotonia (HP:0001290), failure to thrive (HP:0001508), Hyperpigmented spots(HP:0001034), Clinodactyly of the 5th finger (HP:0004209), and dysmorphic features (HP:0001999) that include brachycephaly (HP:0000248), triangular face (HP:0000325), and short philtrum (HP:0000322).	7	Female	WES	Trio	No	No	No	Positive	HDAC8	c.859T>C	p.Cys287Arg	Het	LP	XL	300882	LP (PM1, PM2, PM6, PP2, PP3, PP4)	SCV001133200.1
109	short stature (HP:0004322). dysmorphic features(HP:0001999).	3	Female	WES	Trio	Yes	No	No	Positive	NPR2	c.1032T>G	p.Tyr344*	Hom	P	AR	602875	P (PVS1, PM2, PP2, PP3, PP4)	SCV001133122.1
110	hypotonia(HP:0001290), global developmental delay (HP:0001263)	10	Male	WES	Solo	Yes	Yes	Yes	Positive	USP9X	c.90G>C	p.Gln30His	Hemi	LP	XL	300919	VUS	SCV001133122.2
111	FTT (HP:0001508), high liver enzymes (HP:0002910), and hepatomegaly (HP:0002240)	4	Female	WES	Trio	Yes	No	No	Positive	ABCB4	c.1378A>T	p.Ile460Phe	Hom	LP	AR	602347	LP (PM1, PM2, PP1, PP3, PP4)	SCV000858290.1
112	Intellectual disability, borderline(HP:0006889), Attention deficit hyperactivity disorder(HP:0007018),	10	Female	WES	Trio	Yes	Yes	Yes	Positive	CC2D1A	c.748+1G>T	NA	Hom	P	AR	608443	P PVS1, PM2, PP3, PP5)	SCV001133053.1
113	bone marrow failure (HP:0005528)	4	Female	WES	Trio	Yes	Yes	Yes	Positive	ERCC6L2	c.412C>G	p.Gln138Glu	Hom	LP	AR	615715	VUS PP3)	RCV000902882
114	Spastic paraplegia HP:0001258	18	Male	WES	Trio	Yes	Yes	Yes	Positive	SPG11	c.3425C>G	p.Ser1142Cys	Homo	LP	AR	604360	VUS (BP1)	VCV000406532.3
115	Developmental delay (HP:0001263), Ataxia HP:0001251, Spastic paraparesis HP:0002313, Macrocephaly HP:0000256,	9	Male	WES	Trio	Yes	Yes	Yes	Positive	PSAP	c.722G>C	p.Cys241Ser	Homo	P	AR	249900	P (PS1, PM1, PM2, PP3, PP5)	RCV000588928
116	Developmental delay (HP:0001263), Generalized hypotonia (HP:0001290),	7	Female	WES	Trio	Yes	No	No	Positive	ADNP	c.2157del	p.Tyr719*	Het	LP	AD	615873	LP (PVS1, PM2, BP4)	RCV000985163
117	global developmental delay (HP:0001263), hypotonia HP:0001290, microcephaly HP:0000252, Clonus HP:0002169, increased reflexes HP:0001347, brain atrophy HP:0012444, failure to thrive HP:0001508, Abnormal cry HP:0025429, pallor HP:0000980.	6	Male	WES	Trio	Yes	Yes	Yes	Positive	ETHE1	c.592dupC	p.His198Profs*23	Homo	P	AR	602473	P (PVS1, PM2, PP3)	RCV000598849
118	Delayed motor skills(HP:0002194), Nystagmus(HP:0000639), Speech delay(HP:0000750), Impaired vision(HP:0000505),	8	Male	WES	Solo	Yes	Yes	No	Positive	ATF6	c.511del	p.Ile171Phefs*3	Het	LP	AR	616517	LP PVS1,PM2)	SCV001133070.1
119	failure to thrive HP:0001508, global developmental delay (HP:0001263), hypotonia HP:0001290, areflexia HP:0001284, sloping forhead HP:0000340, micrognathia HP:0000347, depressed nasal bridge HP:0005280, small forehead HP:0000350, anteverted nares HP:0000463, full cheeks HP:0000293, Low anterior hairline HP:0000294, Redundant neck skin HP:0005989, short neck HP:0000470, tapered fingers HP:0001182,…	6	Female	WES	Trio	Yes	No	No	Positive	TTN	c.28174+1G>T	NA	Homo	P	AR	608807 611705	P (PVS1, PM2, PP3)	RCV000985109
120	Mother of 2 deceased children with severe combined immune deficiency Immunodeficiency HP:0002721	26	Female	WES	Solo	Yes	Yes	Yes	Positive	MALT1	c.1240G>A	p.Gly414Arg	Het	LP	AR	615468	VUS (PM2, PP3)	RCV000985110	RAG1	c.416G>T	p.Gly139Val	Het	VUS	AR	601457	VUS (BP4, PM2)	SCV000927368.1
121	global developmental delay (HP:0001263), hypotonia (HP:0001290), spasticity (HP:0001257), muscle wasting (HP:0003202), white matter hyperintensity (HP:0030890), thinning of corpus callosum (HP:0002079)	6	Male	WES	Trio	Yes	Yes	No	Positive	MRE11A	c.630G>C	p.Trp210Cys	Het	LP	AR	604391	LP (BP1, PM1, PM2, PM3, PP3, PP4, PP5)	SCV001133231.1	MRE11A	c.1166T>A	p.Val389Glu	Het	LP	AR	604391	LP (PM1, PM2, PM3, PP3, PP4)	RCV000985223
122	global developemtal delay (HP:0001263),, joint laxity (HP:0001388), broad based gait (HP:0002136), and dysmorphic features (HP:0001999), dolichocephaly(HP:0000268), retrognathia (HP:0000278), and low set ears (HP:0000369).	12	Male	WGS	Plus	Yes	No	No	Positive	ALG13	c.2159G>T	p.Gly720Val	Het	LP	XL	300884	VUS (PM2, BP4)	SCV001133231.2	C6	c.2049C>G	p.Tyr683*	Het	VUS	AR	612446	VUS (PM2, PP3)	SCV001133136.1
123	Intrauterine growth retardation, IUGR(HP:0001511), Spasticity(HP:0001257), Global developmental delay(HP:0001263),	4	Male	WES	Trio	Yes	No	No	Positive	MYO18B	c.6908C>A	p.Ser2303*	Het	P	AR	616549	P (PVS1, PM2, PP3)	SCV001133105.1	MYO18B	c.972_974del	p.Arg325del	Het	P	AR	616549	P (PS4, PM2, PM3, PM4)	RCV000985222
124	Developmental delay (HP:0001263), Intractable epilepsy (HP:0001250), ventriculomegaly (HP:0002119), thinning of the corpus callosum (HP:0002079), Spastic quadriplegia (HP:0002510), Gastroesophageal reflux HP:0002020,	12	Male	WES	Solo	No	No	No	Positive	TUBA1A	c.74G>A	(p.Cys25Tyr)	Het	LP	AD	611603	LP (PM1, PM2, PM6, PP1, PP2, PP3)	SCV001133165.1
125	hypotonia HP:0001290, Developmental delay (HP:0001263), microcephaly HP:0000252	5	Female	WES	Solo	Yes	NA	NA	Positive	MAN1B1	c.403G>A	p.Val135Ile	Homo	LP	AR	614202	VUS	SCV001133052.1	LAMC3	c.1688G>A	p.Arg563Gln	Homo	VUS	AR		VUS (BP4)	SCV001250049.2
126	Diarrhea (HP:0002014), CAH (HP:0008258)	5	Male	WES	Trio	Yes	NA	NA	Positive	CYP21A2	c.850A>G	p.Met284Val	Homo	LP	AR	201910	LP (PM1, PM2, PP1, PP2)	SCV001133113.1	SKIV2L	c.3561_3581del	p.Ser1189_Leu1195del	Homo	VUS	AR	614602	VUS (PM4, PM2, PP2)	SCV001133112.1
127	short stature (HP:0004322)	15	Female	WGS	Trio	NA	Yes	Yes	Positive	GALNS	c.1492G>A	p.(Ala498Thr)	Het	LP	AR	253000	LP (PM1, PM2, PM3, PP2, PP3, PP5)	RCV000985198	GALNS	c.441-862C>T	NA	Het	LP	AR	253000	LP (PS4, PM2)	RCV000985199
128	lymphadenopathy HP:0002716, Hepatosplenomegaly HP:0001433, pancytopenia (HP:0001876)	7	Female	WGS	Trio	Yes	Yes	No	Positive	CECR1	c.882-2A>G	NA	Homo	P	AR	615688	P (PVS1, PM2, PP3)	RCV000985199	PIK3CD	c.2461C>T	p.R821C	Het	VUS	AD	615513	VUS (PM2, PP2, PP3)	SCV000854672.1
129	Weakness HP:0001324, Proximal muscle weakness HP:0003701, Elevated serum creatine kinase HP:00032360,	40	Female	WES	Solo	No	Yes	Yes	Positive	KIAA1107	c.1978A>T	p.Asn660Tyr	Homo	LP	AR	NA	VUS	RCV000974849	ADD2	c.1005G>T	p.Glu335Asp	Homo	VUS	AR	NA	VUS (BP4, BP6, PP1, PP2)	SCV001112109.1
130	End stage renal failure HP:0003774, Nephronophthisis HP:0000090, Hepatic fibrosis HP:0001395, HTN HP:0000822, Hypothyroidism HP:0000821	7	Female	WES	Solo	Yes	No	No	Positive	WDR35	c.206G>A	p.Gly69Asp	Homo	LP	AR	613610 614091	LP (PS4, PM2, PP3)	SCV001133092.1	GBA	c.882T>G	p.His294Gln	Het	LP	AR	230800	LP (PM1, PM2, PP5, PP2)	RCV000589369
131	Developmental delay (HP:0001263), Icthyosis (HP:0008064)	15	Female	WES	Plus	Yes	Yes	Yes	Positive	SUMF1	c.785A>G	p.Gln262Arg	Homo	LP	AR	272200	LP (PM1, PM2, PP1, PP3)	SCV000854672.1	ERCC6	c.3973G>A	p.Ala1325Thr	Homo	VUS	AR	133540	VUS (PP1, PM2)	SCV000854672.1
132	cleft palate HP:0000175, dolichocephaly HP:0000268, sparse hair HP:0008070, high anterior hairline HP:0009890, ptosis HP:0000508, low set earsHP:0000369, override 2nd toe HP:0001780, Femoral bowing HP:0002980, Short stature HP:0004322, Skin dimples HP:0010781	7	Male	WES	Trio	No	No	No	Positive	XYLT1	c.1129C>G	p.Gln377Glu	Het	P	AR	615777	VUS (PM2, PP1, PP4)	SCV000854672.2	XYLT1	c.1841A>G	p.Tyr614Cys	Het	P	AR	615777	VUS (PP1, PP4)	SCV000854672.1
133	intellectual disability HP:0001249, hepatosplenomegaly HP:0001433, hemolytic anemia HP:0001878, Meconium ileus HP:0004401, Cyanosis HP:0000961, Developmental delay (HP:0001263),	18	Female	WES	Plus	No	Yes	Yes	Positive	DHTKD1	c.2402+3A>G	NA	Het	LP	AR	204750	VUS (PM2, PP3)	SCV000854672.3	DHTKD1	c.2444C>T	p.Ser815Phe	Het	VUS	AR	204750	VUS (PM2)	SCV000854672.1
134	Developmental delay (HP:0001263), Generalized hypotonia (HP:0001290), scoliosis (HP:0002650),	14	Female	WES	Trio	Yes	No	No	Positive	ATP8A2	c.2749A>G	p.Asn917Asp	Homo	LP	AR	615268	VUS (PM2, PP3)	SCV001133104.1	COASY	c.895C>A	p.Leu299Met	Homo	VUS	AR	6 615643	VUS (PM2, PP3)	SCV000854672.1
135	Celiac Disease HP:0002608	19	Male	WES	Plus	Yes	Yes	Yes	Positive	RFXANK	c.362A>T	p.Asp121Val	Het	LP	AR	209920	LP (PS4, PP1, PP3, PP5, PM2)	RCV000985115	RFXANK	c.188-11C>T	NA	Het	VUS	AR	209920	VUS (PM3, PP1, PM2)	RCV000985221
136	global developmental delay (HP:0001263), hypotonia (HP:0001290), brachycephaly (HP:0000248), prominent forehead (HP:0011220), low set ears (HP:0000369), epicanthal folds (HP:0000286), strabismus (HP:0000486), upturned nostrils (HP:0000463), small mouth (HP:0000160), wide spaced nipples (HP:0006610), rocker bottom feet (HP:0001838), umbilical hernia (HP:0001537), redundant skin (HP:0001582), incre…	3	Female	WES	Solo	Yes	Yes	No	Positive	ADAT3	c.430G>A	p.(Val144Met)	HOMO	LP	AR	615286	LP (PM2, PP1, PP3, PP4, PP5)	SCV001132975.1
137	Hearing loss(HP:0000365), Central hypotonia(HP:0011398), Severe psychomotor retardation(HP:0011344), Failure to thrive(HP:0001508),	2	Male	WGS	Trio	No	No	No	Positive	GTPBP2	c.1236+1G>A	NA	HOMO	P	AR	617988	P (PVS1, PM2, PP3)	SCV001133142.1	MYO7A	c.133del	p.Glu45Asnfs*26	HET	LP	AR	617988	LP (PVS1, PM1, PM2, PP1, PP3, PP4, PP5)	RCV000985195
138	Developmental delay (HP:0001263), Generalized hypotonia (HP:0001290),	6	Female	WES	Trio	Yes	No	No	Positive	GRM1	c.1073G>A	p.Arg358Lys	Homo	LP	AR	614831	VUS (BP1)	SCV001133142.2	CLN8	c.806A>T	p.Glu269Val	Homo	LP	AR	600143	LP (BP4, PM1, PM2, PP1, PP4, PP5)	SCV001133075.1
139	Mental retardation HP:0001249	17	Male	WES	Trio	Yes	Yes	No	Positive	CUL4B	c.497C>T	p.Ser166Phe	Hemi	LP	XL	300354	VUS (PM2)	SCV001133142.3	SRPX2	c.1321T>G	p.Phe441Val	Hemi	VUS	XL	300643	VUS (PM2, PP3)	SCV000854672.1
140	Agenesis of corpus callosum (HP:0001274), global developmental delay (HP:0001263), spastic diplegia (HP:0001264), microcephaly (HP:0000252)	7	Female	WES	Trio	No	No	No	Positive	ITPR1	c.3161C>T	p.Thr1054Ile	het	LP	AR	206700, 606658, 117360,	VUS (PM2, PP3)	SCV001133142.4	ITPR1	c.7429G>A	p.Gly2477Ser	het	VUS	AR	206700, 606658, 117360,	VUS (BP4, PM2, PP2)	SCV000854672.1
141	Developmental delay(HP:0001263), White matter abnormalities(HP:0002500), Ataxia(HP:0001251),	6	Female	WES	Trio	Yes	Yes	Yes	Positive	LAMA2	c.2755C>T	p.Arg919Cys	Homo	LP	AR	607855	VUS (BP6)	VCV000477457.4	MCOLN1	c.1336G>A	p.Val446Met	Homo	LP	AR		LP (PM2, PP2, PP3, PP4, PP5)	SCV001133212.1
142	Epilepsy (HP:0001250 ), global developmental delay (HP:0001263), hypotonia (HP:0001290)	7	Female	WGS	Trio	No	No	No	Positive	KCNB1	c.1222C>T	p.Pro408Ser	Het	LP	AD	616056	LP (PM2, PM3, PP1, PP2, PP3, PP4)	SCV001133159.1	FGFR3	c.1735T>G	p.Tyr579Asp	Het	VUS	AR	610474	VUS (PM2, PP3)	SCV000854672.1
143	Developmental delay(HP:0001263), Pulmonary stenosis(HP:0001642), Corneal opacity(HP:0007957), Hypertonia(HP:0001276), Hyperreflexia(HP:0001347), Congenital dermal melanocytosis(HP:0100814)	6	Male	WES	Trio	Yes	No	No	Positive	MCOLN1	c.1336G>A	p.Val446Met	Hom	LP	AR	252650	LP (PM2, PP1, PP2, PP3, PP4, PP5)	SCV001133212.1	LZTR1	c.203G>T	p.Arg68Leu	Het	VUS	AD	615670	VUS (PM2, PP3)	SCV000854672.1
144	chiari II Malformation(OMIM207950), Partial agenesis of the corpus callosum(HP:0001338), Polymicrogyria(HP:0002126), frontal bossing (HP:0002007), High-arched palate(HP:0000218), Depressed nasal bridge(HP:0005280), Hypertelorism(HP:0000316)	3	Male	WES	Trio	Yes	No	No	Positive	DACT1	c.979_980del	p.(Trp327Valfs*38)	Het	LP	AD	617466	LP (PVS1, PM2)	RCV000656341
145	Developmental delay (HP:0001263), dysmorphic features (HP:0001999),	4	Male	WES	Plus	Yes	Yes	Yes	Positive	SMG9	c.701+4A>G	NA	Hom	LP	AR	616920	LP (PM2, PP1, PP3, PP3, PP5)	SCV000854654.1	CYP2U1	c.947A>T	p.(Asp316Val)	Hom	LP	AR	615030	LP (PM2, PP1, PP3, PP4, PP5)	SCV000854655.1
146	Congenital adrenal hyperplasia (HP:0008258)	7	Male	WES	Trio	No	No	No	Positive	CYP21A2	c.955C>T	p.(Gln319*)	Hom	LP	AR	201910	LP (PVS1, PM2)	SCV000854658.1	F8	c.2044G>T	p.(Val682Phe)	Het	P	XL	306700	P (PS4, PM1, PM2, PP2, PP4, PP5)	SCV000854659.1
147	Global developmental delay (HP:0001263), Attention deficit hyperactivity disorder (HP:0007018)	5	Female	WES	Trio	No	No	No	Positive	MYT1L	c.1585G>A	p.(Gly529Arg)	Het	LP	AD	616521	LP (PM1, PM2, PM6, PP1, PP2, PP3, PP4, PP5)	SCV000854661.1
148	global developmental delay (HP:0001263), dysmorphic features (HP:0001999), Spastic diplegia (HP:0001264),	12	Female	WES	Plus	Yes	Yes	Yes	Positive	C5orf42	c.7778G>A	p.(Trp2593*)	Hom	P	AR	614615	P (PVS1, PM2, PP1, PP3, PP4, PP5)	SCV000854662.1
149	hyperbilirubinemia (HP:0002904), missing teeth (HP:0006349)	33	Female	WES	Solo	Yes	Yes	Yes	Positive	ABCC2	c.2273G>T	p.(Gly758Val)	Hom	LP	AR	237500	LP (PM1, PM2, PP1, PP3, PP4, PP5)	SCV000778304.2	PTH1R	c.611T>A	p.(Val204Glu)	Hom	VUS	AR	600002	VUS (BS4, PM2, PP3, PP4, PP5)	SCV000854706.1
150	Developmental delay (HP:0001263), Dysmorphic features (HP:0001999), Malar rash (HP:0025300),	5	Male	WES	Trio	Yes	Yes	Yes	Positive	VPS13B	c.1219C>T	p.(Gln407*)	Hom	P	AR	216550	P (PVS1, PM2, PP3, PP5)	SCV000854665.1
151	Microcephaly(HP:0000252), Speech delay(HP:0000750), Developmental delay(HP:0001263).	8	Female	WES	Solo	No	No	No	Positive	PARS2	c.283G>A	p.(Val95Ile)	Hom	LP	AR	612036 203700 616239 612803	VUS (PM2, PP5)	SCV000854666.1
152	Failure to thrive (HP:0001508), Metabolic acidosis (HP:0001942), Hypoglycemia (HP:0001943)	2	Female	WES	Solo	Yes	Yes	Yes	Positive	EPCAM	c.499dup	p.(Gln167Profs*21)	Hom	P	AR	613217	P (PVS1, PM1, PM2, PP5)	SCV000854666.2
153	cleft lip & palate (HP:0000202), congenital heart disease (HP:0030680), global developmental delay (HP:0001263), Bronchomalacia (HP:0002786), Hypotonia (HP:0001290), failure to thrive (HP:0001508),	5	Female	WES	Solo	Yes	No	No	Positive	CHD7	c.6734del	p.(Leu2245Argfs*32)	Het	P	AD	214800	P (PVS1, PM2, PP3)	SCV000854668.1
154	Brain atrophy (HP:0012444), global developmental delay (HP:0001263)	10	Female	WES	Solo	Yes	Yes	Yes	Positive	LPAR6	c.373_374del	p.(Lys125Aspfs*37)	Hom	P	AR	278150	P (PVS1, PM1, PM2)	SCV000854671.1	SUMF1	c.785A>G	p.(Gln262Arg)	Hom	P	AR	272200	P (PS4, PM1, PM2, PP2, PP3)	SCV000854672.1
155	short stature (HP:0004322)	10	Male	WES	Trio	No	Yes	No	Positive	PTPN11	c.794G>A	p.(Arg265Gln)	Het	LP	AD	163950	LP (PM1, PM5, PP2, PP3, PP5)	SCV000854682.1
156	Hepatosplenomegaly (HP:0001433), Coagulopathy (HP:0003256), Epistaxis (HP:0000421), Anemia (HP:0001903), Thrompocytopenia (HP:0001873),	3	Female	WES	Solo	Yes	No	No	Positive	GBE1	c.998A>T	p.(Glu333Val)	Hom	LP	AR	232500	LP (PM1, PM2, PP1, PP3, PP4)	SCV000854685.1
157	miscarriages HP:0005268	34	Female	WES	Trio	Yes	Yes	Yes	Positive	TMEM231	c.685C>G	p.(Leu229Val)	Hom	LP	AR	614970 615397	VUS (PM2)	SCV000854691.1
158	diarrhea (HP:0002014),	2	Female	WES	Trio	Yes	No	No	Positive	SLC9A3	c.932+1G>A	NA	Hom	P	AR	616868	P (PVS1, PM2, PP3)	SCV000854692.1	ATAD3A	c.367del	p.(Arg123Glyfs*45)	Hom	P	AR	617183	P (PVS1, PP1, PP4, PM2, PP5, PP2)	SCV000854693.1
159	FTT HP:0001508, Developmental delay (HP:0001263), Generalized hypotonia (HP:0001290), Nystagmus HP:0000639, squint HP:0000486, Gastroesophageal reflux HP:0002020, Atrial septal defect HP:0001631	2	Female	WES	Trio	Yes	No	No	Positive	ALMS1	c.2731_2734del	p.(Glu911Serfs*20)	Homo	LP	AR	203800	LP (PVS1, PM2)	SCV000854694.1
160	Eczema(HP:0000964), Short stature(HP:0004322), Undescended testes (HP:0000028), Rickets(HP:0002748), Lordosis(HP:0003307), High TSH (HP:0002925)	6	Male	WES	Plus	Yes	Yes	Yes	Positive	WISP3	c.300del	p.(Glu102Lysfs*21)	Hom	P	AR	208230	P (PVS1, PM2, PP5)	SCV000854701.1
161	Developmental delay (HP:0001263), Spina bifida (HP:0002414), epilepsy (HP:0001250), Hearing Defect (HP:0000365)	11	Female	WES	Solo	Yes	Yes	No	Positive	CASK	c.2327_2328del	p.(Asp776Glyfs*13)	Het	P	XL	300749	P (PVS1, PM1, PM2)	RCV000723311
162	Abnormality of deciduous teeth (HP:0006481),	21	Female	WES	Solo	Yes	No	No	Positive	PTH1R	c.611T>A	p.(Val204Glu)	Hom	LP	AR	215045	LP (PM2, PP1, PP3, PP4, PP5)	SCV000854706.1
163	Acute liver failure(HP:0006554), Episodic vomiting (HP:0002572),	19	Female	WES	Solo	Yes	No	No	Positive	DLD	c.685G>T	p.(Gly229Cys)	Hom	LP	AR	246900	LP (PM2, PP1, PP3, PP4, PP5)	RCV000012744
164	hypotonia (HP:0001290), Developmental delay (HP:0001263), hearing loss (HP:0000365), dysmorphism (HP:0001999)	1714	Female	WES	Trio	Yes	Yes	Yes	Positive	CYP27B1	c.305G>A	p.(Gly102Glu)	Hom	LP	AR	264700	LP (PM2, PP1, PP3, PP4, PP5)	SCV000854708.1	TGFBR2	c.1454G>A	p.(Arg485His)	Het	P	AD	610168	P (PS3, PM1, PM2, PM5, PP2, PP3, PP4, PP5)	SCV000854709.1
165	Abnormal heart morphology HP:0001627, Death in infancy HP:0001522, Feeding difficulties HP:0011968, Muscular hypotonia HP:0001252, Respiratory distress HP:0002098	12	Female	WES	Solo	No	No	No	Positive	PEX5	c.1641T>G	p.(Asn547Lys)	Homo	P	AR	616716 202370 214110	P (PVS1, PM2, PP3)	SCV000854715.1
166	Epilepsy (HP:0001250), Intellectual disability (HP:0001249), behavioral problem (HP:0000708), Prognathism (HP:0000303), Dental malocclusion (HP:0000689),	22	Female	WES	Solo	Yes	Yes	Yes	Positive	KCNA2	c.1195G>A	p.(Val399Met)	Het	LP	AD	616366	LP (PM1, PM2, PP1, PP2, PP3, PP4, PP5)	SCV000854717.1
167	Developmental delay (HP:0001263), Hypotonia (HP:0001290), Dysmorphic facial features (HP:0001999), Multiple cafe-au-lait spots (HP:0007565), Bifid ribs (HP:0000892), Pigmentation of the sclera (HP:0007832),	3	Male	WES	Solo	Yes	No	No	Positive	PTPN11	c.1415C>T	p.(Thr472Met)	Het	LP	AD	151100	LP (PM1, PM5, PP2, PP3, PP5)	SCV000854720.1
168	Microcephaly (HP:0000252), Developmental delay (HP:0001263), Seizures (HP:0001250)	5	Male	WGS	Solo	Yes	Yes	Yes	Positive	TRMT10A	c.697_698delinsTA	p.(Pro233*)	Hom	LP	AR	616033	LP (PVS1, PM2)	SCV000854720.2
169	Mental-retardation (HP:0001249), Epilepsy (HP:0001250),	25	Male	WES	Trio	Yes	Yes	Yes	Positive	ARHGEF9	c.311G>A	p.(Arg104Gln)	Hem	LP	XL	300607	LP (PM2, PP1, PP2, PP3, PP4, PP5)	SCV000854721.1
170	global developmental delay (HP:0001263), , ADHD (HP:0007018), seizures (HP:0001250)	8	Male	WES	Trio	No	No	No	Positive	ARID1B	c.5602G>T	p.(Glu1868*)	Het	P	AD	135900	P (PVS1, PM2, PP3)	SCV000854722.1
171	Autism spectrum disorder (HP:0000729), ADHD (HP:0007018), speech delay (HP:0000750), Epilepsy (HP:0001250)	7	Male	WES	Solo	Yes	No	No	Positive	TBCD	c.1661C>T	p.(Ala554Val)	Hom	LP	AR	617193	LP (PM2, PP1, PP3, PP4, PP5)	RCV000723330
172	Pretibial epidermolysis bullosa (HP:0012221)	6	Female	WES	Solo	Yes	Yes	Yes	Positive	FLG2	c.632C>G	p.(Ser211*)	Hom	LP	AR	618084	LP (PM2, PP1, PP3, PP4, PP5)	SCV000854726.1
173	bilateral hearing loss (HP:0000365)	7	Female	WES	Trio	No	Yes	Yes	Inconclusive	MYO7A	c.1903T>C	p.Cys635Arg	Homo	VUS	AR	600060 276000	VUS (PM1, PM2, PP3)	SCV000205643.4
174	hypoglycaemia (HP:0001943), rapid onset obesity (HP:0001513), high TSH (HP:0002925), FT3 (HP:0011788), behavior disorders (HP:0000708), Low Ceruloplasmin(HP:0010837).	14	Female	WES	Solo	Yes	Yes	Yes	Inconclusive	MECR	c.773G>T	p.Arg258Leu	Homo	VUS	AR	617282	VUS (PP3, BP6)	RCV000894291
175	global developmental delay (HP:0001263),hypotonia(HP:0001290) and basal ganglion lesion (HP:0007146),and ambylopia (HP:0000646).	10	Female	WGS	Plus	Yes	Yes	Yes	Inconclusive	COX15	c.750+85A>G	NA	Homo	VUS	AR	256000	VUS (PM2)	SCV000205643.4
176	developmental delay (HP:0001263), Brain atrophy (HP:0012444)	6	Female	WES	Plus	Yes	Yes	Yes	Inconclusive	SEPSECS	c.256C>T	p.Arg86Cys	Homo	VUS	AR	613811	VUS (PM2, PP3)	SCV000205643.5
177	dysmorphic facial features (HP:0001999), seizures (HP:0001250), severe developmental delay (HP:0011344), intellectual disability (HP:0001249), atrial septal defect (HP:0001631), undescended testis (HP:0000028), periventricular leukomalacia (HP:0006970), gliosis (HP:0002171), abnormality of the ribs (HP:0000772)	15	Male	WES	Solo	Yes	No	No	Inconclusive	TTI2	c.1309T>G	p.Cys437Gly	Homo	VUS	AR	615541	VUS (PM2)	SCV000205643.6
178	membranous choanal atresia(HP:0011820), Patent ductus arteriosus(HP:0001643), Optic nerve coloboma(HP:0000588).	3	Male	WGS	Solo	Yes	Yes	Yes	Inconclusive	TCOF1	c.2147A>G	p.Lys716Arg	Het	VUS	AD	154500	VUS (PM2)	SCV000205643.7
179	Hip pain(HP:0030838), Foot pain(HP:0025238),	10	Female	WES	Trio	Yes	No	No	Inconclusive	UFSP2	c.1333G>A	p.Gly445Arg	Homo	VUS	AD	142669	VUS (PP3)	SCV000205643.8
180	Unexplained fevers(HP:0001955), Peripheral neuropathy(HP:0009830), Low back pain(HP:0003419), Hypernatremia(HP:0003228), Obesity(HP:0001513), Hypertension(HP:0000822), Diabetes mellitus (HP:0000819), Coronary artery disease(HP:0001677)	60	Female	WGS	Solo	No	No	No	Inconclusive	SCN5A	c.5215C>T	p.Arg1739Trp	Het	VUS	AD	614022 601144 601154 113900 113900 603830	VUS (PM2, PP3)	VCV000067965.5
181	Multiple fractures (HP:0002757),	11	Female	WES	Trio	Yes	No	No	Inconclusive	TNFSF11	c.561G>C	p.Trp187Cys	Homo	VUS	AR	259710	VUS (PM2, PP3)	VCV000067965.6
182	weakness of limbs (HP:0002273), Slurred speech (HP:0001350), Hypotonia (HP:0001290),	7	Male	WES	Plus	Yes	Yes	Yes	Inconclusive	FASTKD2	c.1496T>C	p.Leu499Ser	Homo	VUS	AR	220110	VUS (PM2)	VCV000067965.7
183	central hypotonia(HP:0011398), intellectual disability(HP:0001249), hyperactivity(HP:0000752), developmental regression(HP:0002376).	3	Male	WES	Trio	Yes	Yes	No	Inconclusive	METTL23	c.271C>G	p.Leu91Val	Homo	VUS	AR	615942	VUS	SCV000595776.1
184	Autism spectrum disorder (HP:0000729)and Attention deficit hyperactivity disorder (HP:0007018), Epilepsy, focal, with speech disorder and with or without mental retardation(OMIM:245570)	5	Male	WES	Plus	No	Yes	Yes	Inconclusive	GRIN2A	c.890G>T	p.Gly297Val	Het	VUS	AD	245570	VUS	SCV000595776.2
185	skeletal dysplasia (HP:0002652), short stature (HP:0004322)	16	Female	WGS	Solo	Yes	Yes	Yes	Inconclusive	RAB33B	c.136A>C	p.Lys46Gln	Homo	VUS	AR	615222	VUS (PM2, PP3, PP5)	SCV000067295.2
186	lower limb muscle weakness (HP:0009053), gower sign (HP:0003391), Macrocephaly (HP:0000256), multiple nevi (HP:0001054), cafe au' lait spots (HP:0000957)	15	Male	WGS	Solo	Yes	No	No	Inconclusive	LRSAM1	c.1600-106A>G	NA	Homo	VUS	AR	614436	VUS (BP4)	SCV000067295.3
187	EHLERS-DANLOS SYNDROME, CLASSIC TYPE, 2 (OMIM: 130010)	28	Female	WES	Trio	Yes	No	No	Inconclusive	COL5A2	c.3260C>G	p.Thr1087Ser	Het	VUS	AD	130010	VUS	SCV000067295.4
188	Developmental delay(HP:0001263), Migrational brain disorder(HP:0002269), Seizures(HP:0001250), Nephrolithiasis(HP:0000787),	22	Male	WES	Solo	Yes	Yes	Yes	Inconclusive	COQ2	c.16C>A	p.Gln6Lys	Hom	VUS	AR	607426	VUS (PM2, BP4)	SCV000778300.1
189	Lower limb weakness(HP:0007340),	17	Female	WES	Trio	Yes	No	No	Inconclusive	PLA2G6	c.958G>A	p.Ala320Thr	Hom	VUS	AR	256600	VUS (PM2, PP2)	SCV000778300.2
190	facial palsy (HP:0010628)	16	Female	WES	Trio	No	Yes	No	Inconclusive	HNRNPA1	c.702_722del	p.Gly235_Gly241del	Het	VUS	AD	615424	VUS (PM2)	SCV000778300.3
191	Speech delay(HP:0000750), Developmental delay (HP:0001263), Autism(HP:0000717),	6	Male	WES	Solo	No	Yes	No	Inconclusive	KCNB1	c.1160C>A	p.Thr387Asn	Het	VUS	AD	616056	VUS (PM2, PP3)	SCV000778300.4
192	End stage renal disease(HP:0003774), Hypertension (HP:0000822), Short stature(HP:0004322),	5	Male	WES	Solo	No	No	No	Inconclusive	NPHP3	c.3406C>T	p.Gln1136*	Hom	VUS	AR	604387	P (PVS1, PM2, PP3)	SCV001133039.1
193	hypoglycemia HP:0001943, diarrhea HP:0002014, elevated liver enzyme HP:0002910, central hypotonia HP:0011398, seizures HP:0001250, global developmental delay (HP:0001263), URTI HP:0002788, Abnormality of the basal ganglia HP:0002134, Lactic acidosis HP:0003128, cardiorespiratory arrest HP:0006543,	6	Male	WGS	Plus	Yes	Yes	Yes	Inconclusive	ELAC2	c.680G>T	p.Gly227Val	Homo	VUS	AD	615440	VUS (PM2, PP3)	SCV001133039.2
194	Motor delay (HP:0001270),speech delay (HP:0000750), Cleft palate (HP:0000175), Dysmorphic facial features, (HP:0001999)	5	Female	WGS	Trio	Yes	Yes	Yes	Inconclusive	TGFBR1	c.1433A>G	p.Asn478Ser	Het	VUS	AD	609192	VUS (PM1, PP2, PP3)	VCV000161393.9
195	Spontaneous abortion HP:0005268	25	Female	WES	Trio	Yes	Yes	No	Inconclusive	RIT1	c.260A>G	p.Asn87Ser	Homo	VUS	AD	615355	VUS (PM2, PP2)	VCV000161393.10
196	cleft lip (HP:0410030), solitary kidney (HP:0000122), 13 pairs ribs (HP:0005815) and anal stenosis (HP:0002025)	4	Female	WES	Trio	Yes	Yes	No	Inconclusive	MASP1	c.1507C>T	p.Arg503Cys	Hom	VUS	AR	257920	VUS (PP3, BP1)	SCV000927703.1
197	microcephaly (HP:0005484), seizures (HP:0001250), global developmental delay (HP:0001263), hypotonia (HP:0001290),	4	Female	WES	Trio	Yes	No	No	Inconclusive	WDR62	c.2972A>T	p.Asp991Val	Hom	VUS	AR	604317	VUS	VCV000328920.2
198	hypotonia(HP:0001290), developmental delay (HP:0001263), joint laxity (HP:0001388) ,seizure (HP:0001250)	8	Male	WES	Trio	Yes	NA	NA	Inconclusive	BRIP1	c.653G>A	p.Cys218Tyr	Hom	VUS	AR	609054	VUS (BP4, BB1, PM1, PM2, PP4)	VCV000407824.4
199	global developmental delay (HP:0001263), Gait ataxia HP:0002066, follow Nystagmus HP:0000639, Intellectual disability HP:0001249	8	Female	WES	Solo	No	No	No	Inconclusive	CACNA1A	c.154A>G	p.Met52Val	Het	VUS	AD	617106, 108500, 141500 183086,	VUS (PP3)	VCV000407824.5
200	Arnold-Chiari malformation (HP:0002308) developmental delay (HP:0001263) & Cerebellar ataxia (HP:0001251)	9	Male	WGS	Trio	Yes	No	No	Inconclusive	MLYCD	c.901G>C	p.Val301Leu	Hom	VUS	AR	248360	VUS PM2, PP3)	RCV000551759
201	Alopecia HP:0001596, Hypotrichosis HP:0001006,	8	Male	WES	Trio	Yes	Yes	Yes	Inconclusive	KRT74	c.1403G>A	p.Ser468Asn	Homo	VUS	AR	614929	VUS (PM2)	RCV000551760
202	speech delay HP:0000750, autistic features HP:0000729, Mild elevation of uric acid HP:0002149.	8	Male	WES	Trio	No	No	No	Inconclusive	ZNF711	c.1744G>A	p.Asp582Asn	Hemi	VUS	XL	300803	VUS (PM2, BP1)	RCV000551761
203	Intellectual disability(HP:0001249), Macrocephaly(HP:0000256), Attention deficit hyperactivity disorder(HP:0007018),	10	Male	WGS	Plus	Yes	Yes	Yes	Inconclusive	SOX5	c.1075G>A	p.(Gly359Ser)	HOMO	VUS	AD	616803	VUS PP3)	SCV000854710.1
204	Learning disability (HP:0001328) ,developmental delay (HP:0001263) and speech delay (HP:0000750), controlled seizure( HP:0001250), squint (HP:0000486).	15	Female	WGS	Trio	Yes	Yes	Yes	Inconclusive	ERCC6L2	c.452A>G	p.His151Arg	Het	VUS	AR	615715	VUS (BP4, PM2, PP4)	SCV000854710.2	ERCC6L2	c.4389 T>A	p.(His1463Gln)	Het	VUS	AR	615715	VUS (BP4, PM2, PP4)	VCV000731230.2
205	Ventricular septal defect (HP:0001629),Right Lung hypoplasia (HP:0002089), Dextrocardia (HP:0001651), FTT (HP:0001508),Polycythemia (HP:0001901)	3	Female	WES	Solo	Yes	Yes	Yes	Inconclusive	IFT172	c.4130C>T	p.Ala1377Val	Het	VUS	AR	615630	VUS (PP3)	SCV001199170.1	IFT172	c.706C>T	p.Arg236Cys	Het	VUS	AR	615630	VUS (PM2, PP4)	SCV000854672.1
206	IUGR (HP:0001511), Developmental regression (HP:0002376),	14	Male	WES	Solo	Yes	No	No	Inconclusive	ANK3	c.1069A>T	p.Asn357Tyr	Het	VUS	AR	615493	VUS	SCV001199170.2	ANK3	c.8534G>A	p.Gly2845Glu	Het	VUS	AR	615493	VUS (PP3, PP4)	VCV000210176.1
207	Optic neuritis (HP:0100653), Ataxia (HP:0001251), multiple spinal cord lesions (HP:0100561), moon face (HP:0500011)	12	Male	WES	Trio	Yes	Yes	Yes	Inconclusive	PHYH	c.173G>T	p.Arg58Ile	Het	VUS	AR	266500	VUS PM2, PP2, PP3)	SCV001199170.3	PHYH	c.244C>G	p.Arg82Gly	Het	VUS	AR	266500	VUS (PM3, PP3, PP4, PP5)	RCV000755126
208	cleft palate (HP:0000175), inguinal (HP:0000023) and umbilical hernia (HP:0001537), Dysmorphic features (HP:0001999)including sparse hair (HP:0008070), shallow orbits (HP:0000586), low set ears (HP:0000369), long philtrum (HP:0000343).	4	Male	WES	Trio	Yes	No	No	Inconclusive	SGSH	c.344G>C	p.Gly115Ala	Hom	VUS	AR	252900	VUS (PM1, PM2, PP3)	SCV001199170.4	PVRL1	c.1133C>T	p.Pro378Leu	Hom	VUS	AR	225060	VUS (BP4, PM2, PP1, PP4)	SCV000854672.1
209	tachypnea HP:0002789, pulmonary hypertension HP:0002092, Poor suck HP:0002033, Metabolic acidosis HP:0001942, Lactic acidosis HP:0003128,	3	Male	WES	Trio	NA	NA	NA	Inconclusive	ECHS1	c.88+5G>A	NA	Homo	VUS	AR	616277	VUS (PM2, PP3, PP5)	SCV000778303.1
210	exessive eating HP:0002591, recurrent vomiting HP:0002013, failling to thrive HP:0001508	8	Male	WES	Plus	Yes	No	No	Inconclusive	MYO5A	c.3098T>G	p.(Leu1033Trp)	Hom	VUS	AR	214450	VUS	SCV000854656.1
211	Multiple cafe-au-lait spots(HP:0007565)	17	Male	WGS	Plus	No	Yes	Yes	Inconclusive	MSH2	c.619G>T	p.(Ala207Ser)	Het	VUS	AD	120435	VUS (PM1, PM2, BP4)	SCV000854657.1
212	developmental delay (HP:0001263), hypotonia (HP:0001290), dysmorphic features (HP:0001999),(broad forehead (HP:0000337), Low-set ears (HP:0000369), long eye lashes (HP:0000527), Bilateral undescended testis (HP:0000028)	6	Male	WGS	Trio	Yes	Yes	No	Inconclusive	UGDH	c.950G>A	p.(Arg317Gln)	Hom	VUS	AR	603370	VUS (BS4, PM2, PP3, PP5)	RCV001004657
213	Speech delay (HP:0000750),	8	Male	WES	Solo	Yes	Yes	Yes	Inconclusive	THOC2	c.133T>A	p.(Phe45Ile)	Hem	VUS	XL	300957	VUS (PM2, BP4)	SCV000854670.1
214	Corpus callosum agenesis (HP:0001274), sagittal craniosynostosis (HP:0004442), failure to thrive (HP:0001508), global developmental delay(HP:0001263), Seizures(HP:0001250), hypertrophic cardiomyopathy (HP:0001639)	4	Male	WGS	Solo	Yes	No	No	Inconclusive	LHX3	c.127A>G	p.(Ile43Val)	Hom	VUS	AR	221750	VUS (PM2, PP3)	SCV000854674.1
215	Epileptic encephalopathy(HP:0200134), Seizures(HP:0001250), Cataract(HP:0000518), Abnormality of the periventricular white matter(HP:0002518), Abnormal social behaviour(HP:0012433).	23	Male	WES	Solo	Yes	No	No	Inconclusive	WFS1	c.2494C>T	p.(Arg832Cys)	Het	VUS	AD	614296 600965 116400 125853	VUS (PP3)	SCV000854677.1
216	Idiopathic thrombocytopenic purpura (HP:0001973),	10	Female	WES	Solo	Yes	No	No	Inconclusive	SLITRK6	c.1904G>A	p.(Arg635His)	Hom	VUS	AR	221200	VUS (BP1)	SCV000854683.1
217	Episodic fever(HP:0001954), Urticaria(HP:0001025), Arthritis(HP:0001369).	17	Male	WES	Trio	No	No	No	Inconclusive	KIT	c.2872A>G	p.(Asn958Asp)	Het	VUS	AD	154800 606764 172800	VUS (PM2, PP3)	RCV000723294
218	Dysmorphic facial features(HP:0001999), Small mandible(HP:0000347), Facial asymmetry(HP:0000324), Abnormality of the zygomatic bone(HP:0010668), Malformed ears(HP:0000377)	5	Female	WES	Solo	No	No	No	Inconclusive	EDN1	c.184G>C	p.(Glu62Gln)	Het	VUS	AD	612798	VUS (PM2, PP3)	SCV000854686.1
219	Patent ductus arteriosus(HP:0001643), Primary pulmonary hypertension(HP:0002092)	1	Male	WES	Solo	Yes	No	No	Inconclusive	LARS2	c.457A>C	p.(Asn153His)	Hom	VUS	AR	617021	VUS (PM2, PP3)	SCV000854687.1
220	Pancreatic cysts(HP:0001737), Gastroesophageal reflux(HP:0002020), Imperforate anus(HP:0002023),	3	Male	WES	Trio	Yes	Yes	No	Inconclusive	LTBP2	c.1934T>C	p.(Leu645Pro)	Hom	VUS	AR	251750 614819	VUS (PM2, PP3)	SCV000854688.1
221	Seizures(HP:0001250), Microcephaly(HP:0000252), Global developmental delay(HP:0001263)	14	Male	WES	Plus	No	Yes	Yes	Inconclusive	POLR1A	c.253C>T	p.(Leu85Phe)	Het	VUS	AD	616462	VUS (PM2, PP3)	SCV000854689.1	GCSH	c.413G>A	p.(Cys138Tyr)	Het	VUS	AR	605899	VUS (PP4, PM2, PP3)	RCV000723300
222	Secundum atrial septal defect(HP:0001684), Primary pulmonary hypertension(HP:0002092)	4	Male	WES	Solo	Yes	Yes	No	Inconclusive	KCNK3	c.250_267dup	p.(Phe84_Thr89dup)	Hom	VUS	AD	615344	VUS (PM2, PM4, PP3)	SCV000854695.1
223	ADHD (HP:0007018), speech delay (HP:0000750)	8	Male	WES	Solo	Yes	Yes	Yes	Inconclusive	SRPX2	c.560C>T	p.(Pro187Leu)	Hem	VUS	AD	300643	VUS (PM2, PP3	SCV000854696.1
224	Pulmonary hypertension (HP:0002092), dysmorphic features (HP:0001999).	3	Male	WES	Solo	No	No	No	Inconclusive	ATRX	c.3535G>A	p.(Val1179Ile)	Hem	VUS	XL	301040 309580 300448	VUS (PM2, BP4)	RCV000723307	DSC2	c.2075T>C	p.(Leu692Pro)	Het	VUS	AD	610476	VUS (PM6, PP3)	SCV000854698.1
225	Scoliosis (HP:0002650), bronchial asthma (HP:0002099), sever muscular weakness (HP:0001324)	12	Male	WES	Trio	Yes	Yes	Yes	Inconclusive	KANK1	c.130G>T	p.(Asp44Tyr)	Hom	VUS	NA	612900	VUS (PM2, PP3)	SCV000854699.1
226	Recurrent renal stone (HP:0000787)	6	Male	WES	Trio	Yes	Yes	Yes	Inconclusive	SLC36A2	c.448G>A	p.(Val150Met)	Het	VUS	AD	138500	VUS (PM2, PP3)	SCV000854700.1
227	Cerebellar atrophy(HP:0001272), Ataxia(HP:0001251)	15	Male	WES	Trio	Yes	Yes	No	Inconclusive	COQ8A	c.1867_1869dup	p.(Leu623dup)	Hom	VUS	AR	612016	VUS (PM2, PM4, PP3)	SCV000854703.1	ROBO3	c.2727C>G	p.(Cys909Trp)	Hom	VUS	AR	607313	VUS (PP4, PP1, PM2)	SCV000854704.1
228	Intellectual disability, mild(HP:0001256), Attention deficit hyperactivity disorder(HP:0007018), Microcephaly(HP:0000252), Dysmorphic facial features(HP:0001999), Speech delay(HP:0000750)	15	Female	WES	Solo	Yes	No	No	Inconclusive	DEAF1	c.776C>T	p.(Ala259Val)	Het	VUS	AD	615828	VUS (PM1, PM2, PP2)	SCV000854705.1
229	Cleft lip/palate (HP:0000202), Dolichocephaly (HP:0000268), Long eyelashes (HP:0000527), Cafe au lait spots (HP:0000957), Hyperpigmented / hypopigmented macules (HP:0007441)	9	Male	WES	Plus	Yes	Yes	Yes	Inconclusive	SOS1	c.2316G>C	p.(Glu772Asp)	Het	VUS	AD	610733	VUS	SCV000854711.1
230	Hypoglycemia (HP:0001943)	13	Female	WES	Plus	Yes	Yes	Yes	Inconclusive	ELN	c.1357G>A	p.(Gly453Ser)	Het	VUS	AD	123700	VUS (PP3)	RCV000723319
231	Developmental delay (HP:0001263), Intellectual disability (HP:0001249), Intention tremor (HP:0002080)	2	Male	WES	Trio	Yes	No	No	Inconclusive	PRUNE1	c.901A>G	p.(Ile301Val)	Hom	VUS	AR	617481	VUS (PM2)	SCV000854713.1	WARS2	c.317C>T	p.(Pro106Leu)	Hom	VUS	AR	617710	VUS (PP1, PP4, PM2, PP3)	SCV000854714.1
232	Obesity (HP:0001513), obstructive sleep apnea (HP:0002870),	4	Male	WGS	Solo	Yes	No	No	Inconclusive	POMC	c.297_298ins90	p.(Gly99_Ala100ins)	Het	VUS	AD	601665	VUS	SCV000854713.2
233	Thrombocytopenia HP:0001873, Seizures HP:0001250,	3	Male	WGS	Solo	Yes	No	No	Inconclusive	CEP164	c.76G>A	p.(Glu26Lys)	Homo	VUS	AR	614845	VUS (PM2, PP3)	SCV000854719.1
234	Hyperactivity (HP:0000752), Developmental delay (HP:0001263), Hypotonia (HP:0001290),	5	Male	WES	Trio	Yes	No	No	Inconclusive	WNT1	c.1090C>G	p.(Arg364Gly)	Hom	VUS	AR	615220	VUS (PM2)	SCV000854723.1
235	Dandy-Walker malformation (HP:0001305), occiptal encephalocele (HP:0002085), G6PD (OMIM:300908)	4	Female	WES	Trio	No	No	No	Inconclusive	KIF11	c.980G>A	p.(Arg327His)	Het	VUS	AD	152950	VUS (PM1, PP3)	SCV000854727.1	G6PD	c.653C>T	p.(Ser218Phe)	Het	P	XL	300908	P (PP1, PP4, PS3, PM1,PP5, PP2, PP3)	SCV000854728.1
236	Dysmorphic facial features (HP:0001999), Failure to thrive (HP:0001508), Abnormal hands (HP:0001155), Abnormality of the feet (HP:0001760),	2	Female	WES	Trio	Yes	No	No	Inconclusive	DSE	c.1625G>A	p.(Gly542Glu)	Hom	VUS	AR	615539	VUS (PM2, BP4)	SCV000854727.2	COL6A2	c.511G>A	p.(Gly171Arg)	Hom	VUS	AR	158810	VUS (PP4, PP3)	SCV000854730.1
237	Seizures (HP:0001250), Cleft lip (HP:0410030), Speech delay (HP:0000750)	7	Female	WES	Solo	No	No	No	Inconclusive	COL4A3BP	c.1719del	p.(Ala574Leufs*30)	Het	VUS	AD	616351	P (PVS1, PM2, PP3)	RCV000723334	KDM5C	c.2114G>A	p.(Arg705His)	Het	VUS	XL	300534	VUS (BS2, PP4, PP1, PM2, PP2, PP3)	SCV000854732.1
238	Dysmorphic facial features(HP:0001999), Spasticity(HP:0001257), Hyperreflexia(HP:0001347), Mongolian spot(HP:0100814), Craniosynostosis(HP:0001363)	2	Male	WES	Solo	Yes	No	No	Inconclusive	SAMHD1	c.571A>G	p.(Ile191Val)	Hom	VUS	AR	612952	VUS (PM2, PP2, PP3)	SCV000854733.1	HBB	c.20A>T	p.(Glu7Val)	Het	P	AD	141749	p (PP1, PP4, PS3, PM1, PP5, PP3)	RCV000224000
239	Dilated cardiomyopathy (HP:0001644), Pulmonary stenosis (HP:0001642), Dysmorphic facial features (HP:0001999)	3	Female	WES	Solo	Yes	No	No	Inconclusive	AGL	c.113C>G	p.(Thr38Ser)	Hom	VUS	AR	232400	VUS (PM2, BP1)	RCV000723338
240	bilateral renal stones(HP:0000787)	8	Male	WES	Trio	No	Yes	No	Negative
241	mirror movment (HP:0001335), enuresis (HP:0000805),	16	Female	WES	Trio	Yes	No	No	Negative
242	Spastic paraplegia, lower limb(HP:0001258), Clonus(HP:0002169), Hyperreflexia(HP:0001347), Progressive spasticity(HP:0002191), Ataxia(HP:0001251)	9	Male	WES	Trio	Yes	No	No	Negative
243	Mental retardation (HP:0001249), Developmental Dysplasia Of The Hip (OMIM:615612),	7	Female	WES	Trio	Yes	No	No	Negative
244	Severe language delay (HP:0000750), Attention-deficit/hyperactivity disorder (HP:0007018), Sever Intellectual Disability (HP:0010864)	11	Male	WES	Solo	Yes	No	No	Negative
245	Developmental delay(HP:0001263), Speech delay(HP:0000750), Cerebellar hypoplasia(HP:0001321), Congenital heart disease(HP:0002564), Coarctation of the aorta(HP:0001680), Atrial septal defect (HP:0001631), Ventricular septal defect (HP:0001629), Hydronephrosis(HP:0000126), Gastroesophageal reflux(HP:0002020), Hypotonia(HP:0001290)	6	Male	WGS	Trio	No	Yes	No	Negative
246	hypertrophic cardiomyopathy HP:0001639	5	Male	WES	Plus	Yes	Yes	Yes	Negative
247	4 years old girl known case of Congenital disorder of Glycosylation type 2L ( CDG2L,Shaheen syndrome) caused by homozygous COG6 gene pathogenic variant (c.1167-24A>G with Improving EBV infection, coagulopath and Pancytopenia	7	Female	WES	Plus	Yes	Yes	No	Negative
248	joint stifness HP:0001387, Arthrogryposis HP:0005684, dysmorphic features (HP:0001999) failling to thrive HP:0001508, swallowing problems HP:0200136	-852	Male	WES	Trio	Yes	No	No	Negative
249	Failure to thrive(HP:0001508), Seizures(HP:0001250), Gastroesophageal reflux(HP:0002020), Failure to thrive(HP:0001508), Hydronephrosis(HP:0000126),	2	Male	WES	Trio	Yes	No	No	Negative
250	Diabetes mellitus(HP:0000819),	7	Female	WES	Solo	No	Yes	Yes	Negative
251	FTT(HP:0001508), Congenital hypothyroidism (HP:0000851), dysmorphic features (Microcephaly(HP:0000252), small triangular face (HP:0000325), Small mandible (HP:0000347) with retrognathia (HP:0000278), high arched palate (HP:0000218), posterior rotated ears (HP:0000358) )	5	Female	WGS	Trio	Yes	No	No	Negative
252	Dilated cardiomyopathy (HP:0001644), severe depressed LV systolic function (HP:0025169), PDA (HP:0001643)	3	Female	WES	Trio	Yes	Yes	Yes	Negative
253	Hypoglycemia (HP:0001943), hypothyrodism (HP:0000821), lactic acidosis (HP:0003128)	2	Male	WES	Solo	Yes	Yes	No	Negative
254	Infertility (HP:0000789).	35	Female	WES	Trio	Yes	No	No	Negative
255	Dysmorphic facial features(HP:0001999), Short neck (HP:0000470), Micrognathia (HP:0000347), Small mouth (HP:0000160)	1	Male	WES	Trio	Yes	No	No	Negative
256	Split-hand (HP:0001171), split-foot (HP:0001839), limb malformation (HP:0007343), 4th-5th finger syndactyly (HP:0010705), missing 2nd and 3rd toes (HP:0001849)	5	Male	WES	Solo	Yes	Yes	Yes	Negative
257	Spastic paraplegia(HP:0001258), Scoliosis(HP:0002650), Developmental delay(HP:0001263), Atopic dermatitis(HP:0001047)	16	Female	WES	Plus	Yes	Yes	Yes	Negative
258	Speech delay (HP:0000750), Thumb hypoplasia (HP:0009778), Functional abnormality of the middle ear (HP:0011452),	6	Male	WES	Solo	Yes	Yes	No	Negative
259	global developmental delay (HP:0001263),hypotonia(HP:0001290), Seizures(HP:0001250), Congenital heart disease(HP:0002564), Chronic lung disease(HP:0006528), Microcephaly(HP:0000252)	2	Female	WES	Solo	No	No	No	Negative
260	refractory ulcerative colitis (HP:0100279)	10	Female	WES	Plus	Yes	Yes	Yes	Negative
261	Autistic behavior HP:0000729	7	Male	WES	Trio	Yes	No	No	Negative
262	von willebrand disease type II (OMIM:613554), Impaired binding of factor VIII to VWF (HP:0040237), Thrombocytosis (HP:0001894), DM Type I (OMIM:222100)	17	Male	WES	Solo	Yes	Yes	Yes	Negative
263	Adrenal insufficiency HP:0000846, Recurrent hypoglycemia HP:0001988,	16	Male	WES	Trio	Yes	Yes	Yes	Negative
264	keratoconus (HP:0000563),	13	Male	WES	Trio	Yes	Yes	No	Negative
265	Seizures (HP:0001250)	2	Female	WES	Trio	No	Yes	No	Negative
266	cholestasis jaundice (HP:0006575), abnormal liver profile (HP:0002910), speech delay (HP:0000750),	6	Male	WES	Trio	Yes	No	No	Negative
267	ADHD (HP:0007018), speech delay (HP:0000750)	10	Male	WES	Plus	No	Yes	Yes	Negative
268	Attention deficit hyperactivity disorder(HP:0007018), Autism spectrum disorder(HP:0000729), Speech delay(HP:0000750)	10	Male	WES	Trio	Yes	Yes	No	Negative
269	Epilepsy (HP:0001250)	7	Male	WES	Solo	Yes	Yes	No	Negative
270	Seizures HP:0001250, Autistic behavior HP:0000729, Global developmental delay HP:0001263, Attention deficit hyperactivity disorder HP:0007018	8	Female	WES	Solo	No	No	No	Negative
271	developmental delay (HP:0001263), speech delay (HP:0000750), Learning difficulty (HP:0001328), ataxic gait (HP:0002066), lordosis (HP:0003307), cataract (HP:0000518),	18	Male	WES	Trio	Yes	Yes	Yes	Negative
272	Seizures (HP:0001250), Intellectual disability (HP:0001249),	16	Female	WES	Plus	Yes	Yes	Yes	Negative
273	Autism spectrum disorder (HP:0000729), Absence seizures (HP:0002121),	11	Male	WES	Plus	Yes	Yes	Yes	Negative
274	hypoglycemia (HP:0001943), abdominal pain (HP:0002027), loss of consciousness (HP:0007185)	7	Female	WES	Trio	Yes	Yes	No	Negative
275	ADHD (HP:0007018), brain malformation (HP:0002508), Intellectual disability (HP:0001249)	14	Male	WES	Trio	No	Yes	Yes	Negative
276	IUGR (HP:0001511), Pierre Robin sequance (HP:0000201), Patent ductus arteriosus (HP:0001643), hydronephrosis (HP:0000126), GERD (HP:0002020), small anterior fontanelle (HP:0000237), hypotelorism (HP:0000601), cleft palate (HP:0000175), low set ears (HP:0000369), umbilical hernia (HP:0001537)	2	Male	WES	Trio	No	No	No	Negative
277	Neutropenia(HP:0001875), Hypogammaglobulinemia (HP:0004313), Periventricular leukomalacia (HP:0006970),	3	Female	WES	Trio	Yes	No	No	Negative
278	Obesity (HP:0001513),	14	Female	WES	Trio	Yes	Yes	Yes	Negative
279	Microcephaly (HP:0000252), partial agenesis of corpus callosum (HP:0001338), epilepsy (HP:0001250), hydronephrosis (HP:0000126)	2	Female	WES	Solo	No	No	No	Negative
280	Dermatitis (HP:0011123)	10	Male	WES	Trio	Yes	Yes	Yes	Negative
281	Speech delay (HP:0000750), Behavioral abnormality (HP:0000708), Attention deficit hyperactivity disorder (HP:0007018), Bilateral clubfeet (HP:0001776),	9	Male	WES	Trio	Yes	Yes	No	Negative
282	Developmental delay (HP:0001263), Spasticity (HP:0001257), Absent septum pellucidum (HP:0001331).	3	Female	WES	Trio	Yes	Yes	No	Negative
283	Adrenal insufficiency (HP:0000846), Episodic vomiting (HP:0002572), Hypoglycemia (HP:0001943).	7	Female	WES	Trio	No	No	No	Negative
284	Scoliosis(HP:0002650), Attention deficit hyperactivity disorder(HP:0007018), Thick eyebrow(HP:0000574), Low-set ears(HP:0000369), Micrognathia(HP:0000347), Squint(HP:0000486), Narrow forehead(HP:0000341), High arched palate(HP:00002180), Joint laxity(HP:0001388), Arachnodactyly(HP:0001166), Flat foot(HP:0001763),	11	Male	WES	Trio	No	No	No	Negative
285	hemimegalencephaly (HP:0007206), Epilepsy (HP:0001250), Deafness (HP:0000365).	15	Male	WES	Trio	No	No	No	Negative
286	Epistaxis (HP:0000421), Thrombocytopenia (HP:0001873).	16	Female	WES	Trio	Yes	No	No	Negative
287	Attention deficit hyperactivity disorder (HP:0007018), Macrocephaly (HP:0000256), Upslanted palpebral fissure (HP:0000582), Autism spectrum disorder (HP:0000729).	10	Male	WES	Trio	No	Yes	No	Negative
288	myopathy (HP:0003198),	15	Male	WES	Solo	Yes	No	No	Negative
289	Intellectual disability (HP:0001249), Speech delay (HP:0000750), Thin nose (HP:0000460), protruding ears (HP:0000411),	6	Female	WES	Trio	Yes	Yes	Yes	Negative
290	short stature (HP:0004322), tiptoe walk (HP:0030051),	16	Female	WES	Trio	Yes	No	No	Negative
291	Multifocal atrial tachycardia (HP:0011701), Episodic metabolic acidosis (HP:0004911), Recurrent diarrhea (HP:0002028).	3	Male	WES	Solo	Yes	No	No	Negative
292	dysmorphic features and multiple congenital anomalies, low birth weight (HP:0001518), hypoxemia (HP:0012418), laryngeal cleft (HP:0008751), global developmental delay (HP:0001263), dysmorphic facial features (HP:0001999), triangular face (HP:0000325), low set ears (HP:0000369), macrognathia (HP:0000303)	7	Male	WES	Trio	Yes	No	No	Negative
293	Cafe au lait spot (HP:0000957), aplasia cutis congenita (HP:0001057), neonatal jaundice (HP:0006579), depressed nasal bridge (HP:0005280), hypertolarism (HP:0000316)	3	Male	WES	Plus	No	No	No	Negative
294	myoclonic seizure (HP:0002123), global developmental delay (HP:0001263), squint (HP:0000486), delayed myelination (HP:0012448), amblyopia (HP:0000646)	8	Female	WES	Trio	Yes	Yes	No	Negative
295	Intellectual disability, borderline (HP:0006889), attention deficit hyperactivity disorder (HP:0007018), sleep disturbance (HP:0002360), helicobacter pylori (HP:0005202), obesity (HP:0001513), recurrent fractures (HP:0002757),	15	Female	WES	Solo	Yes	Yes	Yes	Negative
296	global developmental delay (HP:0001263), hypotonia (HP:0001290)	2	Male	WES	Solo	Yes	Yes	Yes	Negative
297	pulmonary stenosis (HP:0001642), facial dysmorphism (HP:0001999), facial hypoplasia (HP:0000274), pulmonary hypoplasia (HP:0002089), speech delay (HP:0000750), dyslexia (HP:0010522), high forehead (HP:0000348), synophrys (HP:0000664), posteriorly rotated ear (HP:0000358), prominent antitragus (HP:0008593), triangular face (HP:0000325), abnormal size of the palpebral fissures (HP:0200007)	9	Male	WES	Trio	Yes	No	No	Negative
298	Microcephaly (HP:0000252), dysmorphic feature (HP:0001999), intraventricular hemorrhage (HP:0030746),	3	Male	WES	Trio	Yes	No	No	Negative
299	Unsteady gait (HP:0002317), jaundice (HP:0000952), ataxia (HP:0001251), Squint(HP:0000486).	5	Female	WES	Plus	Yes	Yes	Yes	Negative
300	Anal atresia (HP:0002023), congenital corneal opacity (OMIM:608484), Non-restrictive ventricular septal defect (HP:0011684), atrial septal defect, secundum type (HP:0001684), sclerocornea (HP:0000647)	3	Male	WES	Trio	No	Yes	Yes	Negative
301	bilateral postaxial polydactaly (HP:0006136), limb rhizomelic shortness (HP:0008905),	4	Female	WES	Trio	Yes	Yes	No	Negative
302	Developmental delay(HP:0001263), Speech delay(HP:0000750), Attention deficit hyperactivity disorder(HP:0007018), Atrial septal defect(HP:0001631),	9	Male	WES	Plus	Yes	Yes	No	Negative
303	Oligohydroamnios (HP:0001562), Temtamy syndrome (OMIM:218340)	28	Fetus	WES	Trio	Yes	Yes	Yes	Negative
304	Intellectual disability (HP:0001249), Speech delay (HP:0000750),	13	Male	WES	Solo	No	Yes	No	Negative
305	Hypotonia (HP:0001290), Developmental delay (HP:0001263), Intellectual disability (HP:0001249),large forehead (HP:0002003), Failure to thrive (HP:0001508), Short stature (HP:00043220),	16	Female	WES	Solo	Yes	No	No	Negative
306	Narcolepsy (HP:0030050),	12	Female	WES	Solo	Yes	No	No	Negative
307	Seizure (HP:0001250), low set ears (HP:0000369), Relative macrocephaly (HP:0004482).	14	Male	WES	Solo	No	Yes	Yes	Negative
308	Celiac disease(HP:0002608), Diabetes mellitus(HP:0000819), Triangular face(HP:0000325), prominent forehead(HP:0011220), Jaundice (HP:0000952), Failure to thrive(HP:0001508), Cholestasis (HP:0001396)	12	Male	WES	Plus	Yes	Yes	Yes	Negative
309	Global Developmental delay (HP:0001263), hypotonia (HP:0001290), stridor (HP:0010307) ,failure to thrive (HP:0001508), Gastroesophageal reflux (HP:0002020)	2	Male	WES	Solo	Yes	Yes	Yes	Negative
310	Obesity (HP:0001513), Bronchial asthma (HP:0002099), Nocturnal enuresis (HP:0010677),	12	Male	WES	Plus	Yes	Yes	Yes	Negative
311	Warts (HP:0200043), Eczema (HP:0000964),	11	Male	WES	Trio	Yes	Yes	Yes	Negative
312	infantile spasms (HP:0012469), global developmental delay (HP:0001263), central hypotonia (HP:0011398), hyperpigmented macule (HP:0001034)	7	Female	WES	Solo	No	No	No	Negative
313	spotty hypopigmentation (HP:0005590), autism (HP:0000717), impulsive behavior (HP:0006919), speech delay (HP:0000750), attention deficit and hyperactivity disorder (HP:0007018), hirsutism (HP:0001007)	10	Male	WES	Solo	Yes	Yes	No	Negative
314	limb deficiency, absence ulna (HP:0006495), radial aplasia (HP:0003974), sacral dimple (HP:0000960)	2	Female	WES	Solo	Yes	No	No	Negative
315	Autism(HP:0000717),attention deficit hyperactivity disorder(HP:0007018), Macrocephaly(HP:0000256), Intellectual disability(HP:0001249),	9	Male	WES	Trio	Yes	Yes	Yes	Negative
316	chronic diarrhea (HP:0002028), Failure to thrive(HP:0001508)	3	Female	WES	Plus	Yes	Yes	No	Negative
317	Hypertension (HP:0000822), obesity(HP:0001513), pancytopenia (HP:0001876),	67	Female	WES	Solo	Yes	Yes	No	Negative
318	Right hemiplegia (HP:0040293), Weakness of all four limbs (HP:0002273), basal ganglia abnormality (HP:0002134),	11	Male	WES	Trio	Yes	Yes	No	Negative
319	short stature (HP:0004322), growth hormone deficiency (HP:0000824)	16	Male	WES	Solo	Yes	Yes	Yes	Negative
320	failure to thrive(HP:0001508), Developmental delay (HP:0001263), Microcephaly(HP:0000252),Long face (HP:0000276), long eyelashes (HP:0000527), larg ears(HP:0000400), hairy forehead (HP:0011335), bulbous nose(HP:0000414), smooth philtrum (HP:0000319),Hypertonia(HP:0001276)	4	Male	WES	Trio	Yes	No	No	Negative
321	nephromegaly (HP:0000105),	4	Female	WES	Plus	Yes	No	No	Negative
322	Misshapen teeth (HP:0006482), hypodontia (HP:0000668), absent permanent teeth (HP:0006349).	7	Female	WES	Plus	Yes	Yes	Yes	Negative
323	short stature (HP:0004322), bowing of the legs (HP:0002979), metaphyseal widening of the long bones (HP:0003016) and bilateral coxa vara (HP:0002812).	6	Female	WES	Trio	Yes	Yes	Yes	Negative
324	Cleft palate(HP:0000175), micrognathia (HP:0000347), low set ears (HP:0000369), overlapping toes (HP:0001845), Mongolian Spot (HP:0100814).	2	Female	WES	Trio	Yes	Yes	No	Negative
325	IUGR (HP:0001511), opened suture (HP:0000270), Patent foramen ovale (HP:0001655), deformed right ear (hypoplastic), microtia (HP:0008551)	3	Male	WES	Trio	Yes	Yes	Yes	Negative
326	global developmental delay (HP:0001263), facial dysmorphism (HP:0001999), strabismus (HP:0000486)	5	Male	WES	Solo	Yes	No	No	Negative
327	epilepsy (HP:0001250), pachygyria (HP:0001302), hypermyelination (HP:0012754)	3	Female	WES	Solo	No	Yes	No	Negative
328	speech delay (HP:0009889), anxiety (HP:0000739), hyperactivity (HP:0000752), febrile convulsion (HP:0002373), fetal distress (HP:0025116),large for gastional age (HP:0001520),Developmental delay (HP:0001263),Specific learning disability(HP:0001328).	13	Male	WES	Trio	Yes	Yes	Yes	Negative
329	Developmental delay (HP:0001263), Choreoathetoid movement (HP:0001266), seizure (HP:0001250), congenital heart defects (HP:0001627), white matter hyper intensity (HP:0030890),	5	Female	WES	Solo	Yes	No	No	Negative
330	Short stature (HP:0004322) , Osteoporosi (HP:0000939)	16	Female	WES	Solo	Yes	Yes	Yes	Negative
331	IUGR (HP:0001511),developmental delay (HP:0001263) and dysmorphism (HP:0001999). Triangular face (HP:0000325), seizure (HP:0001250).	12	Male	WES	Trio	Yes	Yes	Yes	Negative
332	Obesity (HP:0001513), Ventricular septal defect (HP:0001629)	16	Female	WES	Plus	No	Yes	Yes	Negative
333	mperforate anus (HP:0002023), myelomeningocele (HP:0002475), SHORT NECK (HP:0000470), SCOLIOSIS (HP:0002650), ABNORMAL VERTEBRA (HP:0003468), NARROW CHEST (HP:0000774), SACRAL AGENESIS (OMIM:615709), Solitary left kidney (HP:0000122) with Neurogenic bladder (HP:0000011), Rectovaginal fistula (HP:0000143), Moderate to large patent ductus arteriosus (HP:0001643)	3	Female	WES	Plus	Yes	Yes	Yes	Negative
334	cleft lip unilateral in the Lt side (HP:0100333). bifid uvula (HP:0000193)	3	Female	WES	Trio	Yes	No	No	Negative
335	Cholestic jaundice (HP:0001396), Abnormal coagulation profile (HP:0001928), Bilateral inguinal hernia (HP:0000023), umbilical hernia (HP:0001537), Recurrent hypoglycemia (HP:0001988)	3	Male	WES	Solo	Yes	No	No	Negative
336	speech delay (HP:0000750). seizure disorder (HP:0001250), polymicrogyria(HP:0002126)	8	Female	WES	Trio	Yes	No	No	Negative
337	right ear microtia (HP:0008551) and left preauricular skin tag (HP:0000384), resolved hydronephrosis (HP:0000126) and resolved Patent ductus arteriosus PDA (HP:0001643).	3	Male	WES	Trio	Yes	No	No	Negative
338	Hiccups (HP:0100247), myclonic seizures (HP:0002123)	3	Female	WES	Solo	Yes	No	No	Negative
339	Multiple congenital anomalies includes Esophageal atresia (HP:0002032), left renal agenesis (HP:0000104), polysyndactyly (HP:0005873), congenital heart disease(HP:0030680).	3	Female	WES	Solo	No	No	No	Negative
340	Global Developmental delay (HP:0001263), nystagmus (HP:0000639) ,lower limb spasticity(HP:0002061) ,growth retardation (HP:0001510), involuntary movement (HP:0004305), seizures (HP:0001250)	14	Female	WES	Trio	Yes	Yes	No	Negative
341	Seizures (HP:0001250).	39	Fetus	WES	Trio	Yes	No	No	Negative
342	global developmental delay (HP:0001263), hypotonia (HP:0001290), seizure (HP:0001250)	4	Female	WES	Trio	Yes	Yes	Yes	Negative
343	Gait ataxia(HP:0002066), Hearing loss(HP:0000365), Abnormality of vision(HP:0000504), Developmental delay(HP:0001263), Intellectual disability(HP:0001249), White matter abnormalities(HP:0002500).	30	Male	WGS	Solo	Yes	No	No	Negative
344	flat and wide forehead HP:0000290, low set ears HP:0000369, macrotia HP:0000400, triangular face HP:0000325, micrognathia HP:0000347, short webbed neck HP:0000465, polydactyly HP:0010442,	3	Female	WGS	Plus	Yes	Yes	Yes	Negative
345	hyperglycaemia (HP:0003074), hypokalaemia (HP:0002900)	11	Female	WGS	Plus	No	Yes	Yes	Negative
346	Global developmental delay (HP:0001263), hydrocephalus (HP:0000238), DDH, polyhydramnios (HP:0001561)	5	Female	WGS	Solo	Yes	No	No	Negative
347	Short stature (HP:0004322), Hemihypertrophy(HP:0001528), Spondylometaphyseal dysplasia (HP:0002657), Mild developmental delay (HP:0011342)	4	Male	WGS	Plus	Yes	Yes	Yes	Negative
348	Autistic spectrum disorder (HP:0000729), Speech delay (HP:0000750), Hyperactivity (HP:0000752)	8	Male	WGS	Trio	Yes	No	No	Negative
349	failure to thrive (HP:0001508), joint laxity (HP:0001388), small kidney on one side (HP:0012583)	9	Female	WGS	Trio	Yes	No	No	Negative
350	tachycardia (HP:0001649) frontal bossing (HP:0002007), high forehead (HP:0000348), short neck (HP:0000470), thin upper lip (HP:0000219), retrognathia (HP:0000278), and Flat feet (HP:0001763). Mitral valve prolapse (HP:0001634).	13	Male	WGS	Trio	No	No	No	Negative
351	Autistic behavior HP:0000729, Intellectual disability HP:0001249, Developmental delay (HP:0001263)	14	Male	WGS	Plus	No	Yes	Yes	Negative
352	Hemolytic Anemia (HP:0001878)	7	Male	WGS	Solo	Yes	No	No	Negative
353	Microcephaly(HP:0000252), Developmental delay(HP:0001263), Spasticity(HP:0001257), Callosal agenesis(HP:0001274)	4	Male	WGS	Trio	Yes	No	No	Negative
354	scoliosis ( HP:0002650)	1	Male	WGS	Plus	Yes	Yes	Yes	Negative
355	Left ventricular hypertrophy(HP:0001712), Seizures(HP:0001250), Arrhythmia(HP:0011675),	2	Female	WGS	Solo	Yes	No	No	Negative
356	Polycystic kidney disease(HP:0000113)	2	Male	WGS	Solo	Yes	Yes	Yes	Negative
357	Global developmental delay (HP:0001263), Dysmorphic features (HP:0001999), Epilepsy (HP:0001250), Thoracolumbar scoliosis (HP:0002944)	2	Female	WGS	Plus	Yes	Yes	Yes	Negative
358	Neutropenia (HP:0001875), Bone marrow hypocellularity (HP:0005528).	1	Female	WGS	Plus	No	No	No	Negative
359	Ventricular septal defect (HP:0001629), Gastroesophageal reflux (HP:0002020),	2	Male	WGS	Solo	Yes	No	No	Negative
360	developmental delay (HP:0001263), Intellectual disability(HP:0001249), High forehead(HP:0000348), Sloping forehead(HP:0000340), Low-set ears(HP:0000369), High-arched palate(HP:0000218).	2	Female	WGS	Plus	No	No	No	Negative
361	Epilepsy(HP:0001250), Bronchial asthma(HP:0002099), behavioral problem (HP:00007080), Anxiety(HP:00007390, Intellectual disability, borderline(HP:00068890),	2	Male	WGS	Solo	No	No	No	Negative
362	Microcephaly(HP:0000252), Developmental delay (HP:0001263), Severe failure to thrive(HP:0001525), Dysphagia( HP:0002015), Recurrent aspiration pneumonia(HP:0002100 ), Bronchiolitis( HP:0011950), Dehydration( HP:0001944), Hypertonia(HP:0001276), Hyperreflexia(HP:0001347 )	2	Male	WGS	Plus	Yes	Yes	No	Negative
363	spastic diplegia (HP:0001264), global developmental delay (HP:0001263), seizure (HP:0001250), ventriculomegaly (HP:0002119), polyhydraminos (HP:0001561), polymicrogyria (HP:0002126), cerebellar hypoplasia (HP:0001321), hyperreflexia (HP:0001347), central hypotoia (HP:0011398),	2	Male	WGS	Trio	Yes	No	No	Negative
364	Intellectual disability (HP:0001249), central hypotonia (HP:0011398), proximal musle weakness (HP:0003701), positive gower sign (HP:0003391), gynecomastia (HP:0000771), joint laxaty (HP:0001388),	2	Male	WGS	Trio	Yes	Yes	No	Negative
365	hepatosplenomegaly (HP:0001433), thrombocytopenia (HP:0001873), haemolytic anaemia (HP:0001878),	2	Male	WGS	Trio	Yes	Yes	No	Negative
366	Hashimoto thyroiditis(HP:0000872), Generalized lymphadenopathy(HP:0008940), Eczema(HP:0000964),	2	Male	WGS	Trio	Yes	No	No	Negative
367	blond hair (HP:0002286) , Omphalocele (HP:0001539), and bilateral inguinal hernia (HP:0000023) , Large left hydrocele (HP:0000034) , Atrial situs ambiguous (HP:0011539) ,atrial septal defect (HP:0001631), Right ventricular dilatation(HP:0005133), Right atrial enlargement(HP:0030718), Hydrocele(HP:0000034), Developmental delay(HP:0001263).	2	Male	WGS	Solo	No	No	No	Negative
368	Imperforate anus(HP:0002023), Scoliosis(HP:0002650), Aortic stenosis(HP:0001650), Missing kidney(HP:0000104), Spinal dysraphism(HP:0010301), Bilateral talipes equinovarus(HP:0001776)	2	Female	WGS	Solo	No	No	No	Negative
369	Developmental delay(HP:0001263), Lower limb muscle weakness(HP:0007340), Wide-based gait(HP:0002136), Hyperreflexia(HP:0001347).Focal white matter lesion (HP:0007042),	2	Male	WGS	Plus	Yes	Yes	Yes	Negative
370	speech delay (HP:0000750) and Attention deficit hyperactivity disorder(HP:0007018), with hyperintensity foci (HP:0030892)	2	Male	WGS	Trio	No	Yes	No	Negative
371	Global developmental delay(HP:0001263), Speech delay(HP:0000750), Agenesis of corpus callosum(HP:0001274), Failure to thrive(HP:0001508), Hypospadias(HP:0000047), Hydronephrosis(HP:0000126), Aggressive behaviour(HP:0000718), Dysmorphic (HP:0001999), (strabismus (HP:0000486), hirsutism (HP:0001007), abnormal teeth (HP:0000164),low set ear (HP:0000369), thick lips (HP:0012471),bulbous nose(HP:00004…	5	Male	WGS	Trio	No	No	No	Negative
372	global developemtal delay (HP:0001263), dysmorphic features, tringular face (HP:0000325), microcephaly (HP:0000252), prominent ears (HP:0000411), protrouding ear (HP:0000411), supracardiac total anomalous pulmonary venous connection (HP:0011719), diaphramatic paralysis (HP:0009113), pectus excavatum (HP:0000767), delayed myelination (HP:0012448), adenoid hypertrophy (HP:0040261)	9	Female	WGS	Trio	Yes	No	No	Negative
373	absent septum pellucidum(HP:0001331), Partial agenesis of the corpus callosum(HP:0001338), Dysmorphic features(HP:0001999), Frontal bossing(HP:0002007), Light colored hair(HP:0002286), High forehead(HP:0000348), Low-set ears(HP:0000369 ), Prominent ear lobes(HP:0009748), Hypoplastic helices(HP:0008589), Prominent antihelix( HP:0000395), Triangular face(HP:0000325), Long philtrum( HP:0000343), Thi…	3	Male	WGS	Trio	Yes	No	No	Negative
374	Hypotonia (HP:0001290), Moderate deveolpmental delay (HP:0011343), Laryngeomalacia (HP:0001601), adenoid hypertrophy (HP:0040261), Failure to thrive (HP:0001508), GERD (HP:0002020), fetal distress (HP:0025116), oligohydramnios (HP:0001562), respiratory distress (HP:0002098), dysmorphic (HP:0001999), overfold ears (HP:0000396), triangular face (HP:0000325), delayed myelination (HP:0012448), globus…	4	Male	WGS	Trio	Yes	No	No	Negative
375	Developmental delay (HP:0001263), and learning disability(HP:0001328), Hypotonia(HP:0001290), Nystagmus (HP:0000639).	8	Female	WGS	Solo	Yes	Yes	No	Negative
376	infantile spasm (HP:0012469), global developmental delay (HP:0001263), triangular face (HP:0000325), Superiorly displaced ears (HP:0008541), hypotonia (HP:0001290), cryptorchidism (HP:0000028)	8	Male	WGS	Solo	Yes	Yes	No	Negative
377	Gait disturbance (HP:0001288), developmental delay (HP:0001263), squint (HP:0000486), dry skin (HP:0000958), unilateral Myopia (HP:0000545), intestinal obstruction (HP:0005214)	11	Female	WGS	Trio	No	Yes	Yes	Negative
378	dolichocephaly (HP:0000268), posteriorly rotated ears (HP:0000358), micrognathia (HP:0000347), Pulmonary artery atresia (HP:0004935), Major aortopulmonary collateral arteries (HP:0011678), Hydronephrosis (HP:0000126), agnesis of corpus callosum (HP:0001274), sagittal craniosynostosis (HP:0004442), Scaphocephaly (HP:0030799), Undescended Testis (HP:0000028), hypotonia (HP:0001290), Low set ears (H…	3	Male	WGS	Solo	Yes	Yes	Yes	Negative
379	seizure (HP:0001250), laryngomalacia (HP:0001601), hypotonia(HP:0001290), brain atrophy (HP:0012444), developmental delay (HP:0001263), GERD (HP:0002020)	5	Female	WGS	Plus	Yes	Yes	Yes	Negative
380	cholestasis (HP:0001396), jaundce (HP:0000952), back pain (HP:0003418), Scarring alopecia of scalp (HP:0004552), patchy hypopigmentation (HP:0005590) lesion with itchiness (HP:0000989), chronic dematitis (HP:0011123), thoracic scliosis (HP:0002943),	15	Male	WGS	Solo	Yes	Yes	Yes	Negative
381	Seizure (HP:0001250), developmental delay (HP:0001263)	15	Male	WGS	Solo	Yes	No	No	Negative
382	Hyperinsulinemia HP:0000842	9	Male	WGS	Trio	Yes	No	No	Negative
383	Type I diabetes mellitus(HP:0100651), Seizures(HP:0001250), Microcephaly(HP:0000252), Hypotonia(HP:0001290), Severe global developmental delay(HP:0011344), Bronchial asthma(HP:0002099),	7	Female	WGS	Trio	Yes	No	No	Negative
384	Seizures (HP:0001250), Global developmental delay (HP:0001263), Microcephaly (HP:0000252), Glaucoma (HP:0000501), Diaphragmatic hernia (HP:0000776)	10	Male	WGS	Trio	No	Yes	Yes	Negative
385	Epilepsy (HP:0001250).	17	Male	WGS	Plus	Yes	Yes	No	Negative
386	Global developmental delay (HP:0001263), Attention deficit hyperactivity disorder (HP:0007018)	6	Female	WGS	Solo	Yes	Yes	No	Negative
387	Pure red cell aplasia (HP:0012410), Obesity (HP:0001513), Short stature (HP:0004322), Aplastic anemia (HP:0001915),	19	Male	WGS	Solo	Yes	Yes	No	Negative
388	Difficulty walking HP:0002355,Loss of speech HP:0002371,Visual loss HP:0000572, Nystagmus HP:0000639, Developmental regression HP:0002376, Febrile seizures HP:0002373	11	Male	WGS	Solo	Yes	Yes	Yes	Negative
389	global developmental delay (HP:0001263), squint (HP:0000486), blue sclerae (HP:0000592), dysmorphic features (HP:0001999), hyperlaxity/hypermobility (HP:0002761), yellowish discoloration of the nails (HP:0011367), Brachycephaly (HP:0000248), triangular face (HP:0000325), low anterior hairline (HP:0000294), clubbing of feet (HP:0100760)	8	Male	WGS	Solo	No	No	No	Negative
390	failure to thrive (HP:0001508), Hypotonia (HP:0001290), spastic quadriplegia (HP:0002510), amblyopia (HP:0000646). Dysmorphic Microcephaly (HP:0000252),	8	Female	WGS	Plus	Yes	Yes	No	Negative
391	hypotonia(HP:0001290), developmental delay (HP:0001263) and lactic acidosis(HP:0003128)	7	Male	WGS	Trio	No	No	No	Negative
392	osteopetrosis (HP:0011002), Abnormality of vision(HP:0000504),multiple fractures (HP:0002757).	15	Male	WGS	Trio	Yes	Yes	Yes	Negative
393	Mental-retardation (HP:0001249), Attention deficit hyperactivity disorder (HP:0007018), Obesity (HP:0001513), Bronchial asthma (HP:0002099).	15	Male	WGS	Trio	Yes	No	No	Negative
394	Epilepsy (HP:0001250), ataxia (HP:0001251), global developmental delay (HP:0001263), ADHD (HP:0007018)	7	Male	WGS	Trio	Yes	No	No	Negative
395	global Developmental delay (HP:0001263) ,choreoathetoid movement (HP:0001266) and severe to profound sensorineural hearing loss (SNHL) bilaterally (HP:0000407). swallowing difficulty (HP:0002015) .	7	Male	WGS	Trio	No	Yes	No	Negative
396	lower limb spasticity (HP:0002061), tip toe gait (HP:0030051),	9	Female	WGS	Trio	Yes	No	No	Negative
397	Obesity(HP:0001513), elevated liver enzymes(HP:0002910),	16	Female	WGS	Trio	No	No	No	Negative
398	hypotonia(HP:0001290), White matter abnormalities (HP:0002500), developmental delay (HP:0001263) , nystagmus (HP:0000639)	4	Male	WGS	Trio	Yes	Yes	Yes	Negative
399	Global developmental delay (HP:0001263), Dysmorphic features (HP:0001999), (Microcephaly (HP:0000252), depressed nasal bridge (HP:0005280), narrow bitemporal diameter (HP:0000341), Chronic diarrhea since birth (HP:0002028), FTT (HP:0001508), Generalized osteopenia (HP:0000938), Large A-V malformation (HP:0100026).	6	Male	WGS	Trio	Yes	No	No	Negative
400	mental retardation (HP:0001249), epilepsy (HP:0001250), and hyperactivity (HP:0000752).	14	Male	WGS	Solo	Yes	Yes	Yes	Negative
401	Cow milk allergy (HP:0100327), failure to thrive (HP:0001508), Global developmental delay (HP:0001263), Squint (HP:0000486), delay bone age (HP:0002750), prominant forehead (HP:0011220), depressed nasal bridge (HP:0005280), wide-based gait (HP:0002136), frequent falls (HP:0002359).	7	Female	WGS	Plus	Yes	No	No	Negative
402	Chronic diarrhea(HP:0002028), Pharyngeal dysphagia (HP:0200136), Immunodeficiency (HP:0002721), history of hypoglycemia (HP:0001943), pancytopenia (HP:0001876), bleeding tendency (HP:0001892)	10	Female	WGS	Trio	Yes	No	No	Negative
403	ectodermal dysplasia(HP:0000968) hypotrichosis (HP:0001006) , delayed speech (HP:0000750) , ADHD (HP:0007018), conical tooth(HP:0000698) .	6	Male	WGS	Trio	Yes	No	No	Negative
404	frequent fall (HP:0002359), unsteady gait (HP:0002317), hypotonia (HP:0001290), muscle weakness (HP:0003324), positive gower sign (HP:0003391)	9	Male	WGS	Trio	No	No	No	Negative
405	blue sclera (HP:0000592), pigmentation of the sclera (HP:0007832)	10	Female	WGS	Solo	No	Yes	Yes	Negative
406	Hypergonadotrophic hypogonadism (HP:0000815), hearing defect (HP:0000365), Low anterior hairline (HP:0000294), prominent nose (HP:0000448), narrow bifrontal diameter	19	Male	WGS	Solo	Yes	Yes	Yes	Negative
407	Strokelike episodes(HP:0002401), Headache( HP:0002315), Vomiting(HP:0002013 ), Abdominal pain( HP:0002027),Progressive encephalopathy( HP:0002448 ), Spastic quadriplegia( HP:0002510),	21	Male	WGS	Plus	Yes	Yes	Yes	Negative
408	Developmental delay(HP:0001263), Profound sensorineural hearing impairment (HP:0011476), Hypotonia(HP:0001290), Low weight(HP:0004325),	7	Female	WGS	Trio	No	No	No	Negative
409	progressive congenital scoliosis (HP:0008458), lumber hemiverterbrae (HP:0008439). butterflay vertebra (HP:0003316), Venricular septal defect (HP:0001629), atrial septal defect (HP:0001631), preauricular skin tag (HP:0000384), missing kidney (HP:0000104)	4	Female	WGS	Trio	No	Yes	No	Negative
410	Developmental delay (HP:0001263), Hypotonia(HP:0001290), Microcephaly(HP:0000252), brachycephaly (HP:0000248), eczema (HP:0000964), developmental dysplasia of the hip(HP:0001385),	5	Male	WGS	Solo	Yes	No	No	Negative
411	Neurodegeneration HP:0002180, Abnormality of the basal ganglia HP:0002134, Spastic tetraparesis HP:0001285, hypotonia (HP:0001290), Seizures HP:0001250, Developmental delay (HP:0001263), Obstructive sleep apnea HP:0002870	9	Male	WGS	Solo	NA	NA	NA	Negative
412	seizure (HP:0001250),	15	Male	WES	Plus	No	Yes	Yes	Negative
413	developmental delay (HP:0001263), hypotonia (HP:0001290), hydronephrosis (HP:0000126), dysmorphic features (HP:0001999), Triangular face (HP:0000325) low set ears (HP:0000369).	4	Female	WES	Trio	No	No	No	Negative
414	developmental delay (HP:0001263), diarrhea since birth (HP:0002014)	3	Male	WES	Solo	Yes	Yes	No	Negative
415	Hypothyroidism (HP:0000821), corpus callosum agenesis (HP:0001274), focal seizure (HP:0007359),global developemtal delay (HP:0001263), hypotonia (HP:0001290),	6	Female	WES	Solo	Yes	No	No	Negative
416	global developemtal delay (HP:0001263), Scoliosis (HP:0002650), hypogammaglobulinemia (HP:0004313), interstitial lung disease (HP:0006530), cardiomyopathy (HP:0001638), GERD (HP:0002020), coarse facial features (HP:0000280), thick eyebrow (HP:0000574), gum hypertrophy (HP:0000212), micrognathia (HP:0000347), hyperpigmentation (HP:0000953), hypotonia (HP:0001290), spasticity (HP:0001257), hyperref…	18	Female	WES	Trio	Yes	Yes	Yes	Negative
417	Speech delay (HP:0000750), Contracture of the proximal interphalangeal joint of the 5th finger (HP:0009185), spotty hypopigmentation (HP:0005590)	6	Male	WES	Trio	Yes	No	No	Negative
418	poor speech (HP:0002465), intellectual disability (HP:0001249)	15	Male	WES	Solo	No	Yes	Yes	Negative
419	Preauricular skin tag (HP:0000384), Laryngomalacia (HP:0001601), adenoid hypertrophy (HP:0040261)	14	Female	WES	Plus	Yes	Yes	Yes	Negative
420	Ataxia(HP:0001251), Global developmental delay(HP:0001263), Bronchial asthma(HP:0002099)	7	Male	WES	Trio	Yes	No	No	Negative
421	developmental delay (HP:0001263), speach delay (HP:0000750), hypotonia (HP:0001290), seizures (HP:0001250)	8	Male	WES	Trio	Yes	Yes	No	Negative
422	Bronchial asthma (HP:0002099), mild developmental delay (HP:0011342), macrocephaly (HP:0000256), learning disability (HP:0001328), scoliosis (HP:0002650)	12	Male	WES	Trio	Yes	No	No	Negative
423	learning disability (HP:0001328), speech delay (HP:0000750), hypertrichosis (HP:0000998) subclinical hypothyroidism and precocious puberty (HP:0000826)	16	Female	WES	Trio	No	No	No	Negative
424	Encephalopathy (HP:0001298), seizure (HP:0002197), Resolved brain herniation, Bilateral vocal cord paresis (HP:0012822), Resolved bilateral hydronephrosis (HP:0000126), Bilateral Shoulder Dislocation (HP:0003834)	13	Male	WES	Trio	No	No	No	Negative
425	Hyperpigmented/hypopigmented macules(HP:0007018).	19	Male	WES	Solo	No	Yes	No	Negative
426	restrictive cardiomyopathy(HP:0001723) GERD (HP:0002020), bronchial asthma (HP:0002099) and eczema (HP:0000964).	15	Male	WES	Solo	Yes	No	No	Negative
427	FTT(HP:0001508), anemia (HP:0001903), and HSM. Extensive hematologic ,G6PD (Decreased glucosephosphate isomerase activity (HP:0003568), Hepatosplenomegaly (HP:0001433)	12	Male	WES	Trio	Yes	No	No	Negative
428	Dysmorphic facial features (HP:0001999), Developmental delay (HP:0001263), Hypotonia (HP:0001290), Plagiocephaly (HP:0001357),	6	Male	WES	Solo	Yes	No	No	Negative
429	cleft palate (HP:0000175)	5	Male	WES	Trio	No	Yes	No	Negative
430	Global developmental delay(HP:0001263), Intellectual disability(HP:0001249), Obesity(HP:0001513), Profound sensorineural hearing impairment (HP:0011476), Hyperactivity(HP:0000752).	15	Male	WES	Trio	Yes	Yes	Yes	Negative
431	polyhydramnios (HP:0001561), neonatal jaundice (HP:0006579), hypotonia (HP:0001290), nystagmus (HP:0000639), dolichocephaly (HP:0000268), wide AF (HP:0000260), high forehead (HP:0000348), long face (HP:0000276), ptosis (HP:0000508), long eyelashes (HP:0000527), epicanthal folds (HP:0000286), prominent ears (HP:0000411), small jaw (HP:0000347).	4	Male	WES	Trio	Yes	No	No	Negative
432	Autism spectrum disorder (HP:0000729), developmental delay (HP:0001263)	9	Male	WES	Trio	No	Yes	Yes	Negative
433	speech delay(HP:0000750), hyperactivity(HP:0000752), Developmental regression(HP:0002376),	10	Male	WES	Solo	Yes	No	No	Negative
434	Thrombocytopenia (HP:0001873), Cholestasis (HP:0001396), Elevated liver enzymes (HP:0002910), Coagulopathy (HP:0003256),	4	Male	WES	Trio	No	No	No	Negative
435	Autistic behavior (HP:0000729), attention deficit hyperactivity disorder (HP:0007018), Developmental delay (HP:0001263), Muscular hypotonia (HP:0001252), Heart murmur (HP:0030148), cavum septum pellucidum (HP:0002389),	11	Male	WES	Trio	Yes	Yes	Yes	Negative
